# Supplementary material for: Study protocol for a single-blind, randomised controlled, non-inferiority trial of internet-based versus face-to-face cognitive behaviour therapy for obsessive–compulsive disorder
Source: PubMed Central journal article supplement — BMJ Open. 2018 Sep 5;8(9):e022254. doi: 10.1136/bmjopen-2018-022254 (PMC6129083; doi:10.1136/bmjopen-2018-022254), 2018-09-05
Supplement: bmjopen-2018-022254.draft_revisions.pdf [file bmjopen-2018-022254.draft_revisions.pdf]

# BMJ Open

BMJ Open is committed to open peer review. As part of this commitment we make the peer review history of every article we publish publicly available.

When an article is published we post the peer reviewers' comments and the authors' responses online. We also post the versions of the paper that were used during peer review. These are the versions that the peer review comments apply to.

The versions of the paper that follow are the versions that were submitted during the peer review process. They are not the versions of record or the final published versions. They should not be cited or distributed as the published version of this manuscript.

BMJ Open is an open access journal and the full, final, typeset and author-corrected version of record of the manuscript is available on our site with no access controls, subscription charges or pay-per-view fees (<http://bmjopen.bmj.com>).

If you have any questions on BMJ Open's open peer review process please email [info.bmjopen@bmj.com](mailto:info.bmjopen@bmj.com)

# BMJ Open

## Study protocol for a single-blind, randomized controlled, non-inferiority trial of Internet-based versus face-to-face cognitive behaviour therapy for obsessive-compulsive disorder

|                               |                                                                                                                                                                                                                                                                                                                                                                                                                                                                          |
|-------------------------------|--------------------------------------------------------------------------------------------------------------------------------------------------------------------------------------------------------------------------------------------------------------------------------------------------------------------------------------------------------------------------------------------------------------------------------------------------------------------------|
| Journal:                      | <i>BMJ Open</i>                                                                                                                                                                                                                                                                                                                                                                                                                                                          |
| Manuscript ID                 | bmjopen-2018-022254                                                                                                                                                                                                                                                                                                                                                                                                                                                      |
| Article Type:                 | Protocol                                                                                                                                                                                                                                                                                                                                                                                                                                                                 |
| Date Submitted by the Author: | 09-Feb-2018                                                                                                                                                                                                                                                                                                                                                                                                                                                              |
| Complete List of Authors:     | Rück, Christian; Karolinska Institutet, Department of Clinical Neuroscience<br>Lundström, Lina; Karolinska Institutet Department of Clinical Neuroscience<br>Flygare, Oskar; Karolinska Institutet Department of Clinical Neuroscience<br>Enander, Jesper<br>Bottai, Matteo; Karolinska Institutet, IMM<br>Mataix-Cols, David; Karolinska Institutet, Department of Clinical Neuroscience<br>Andersson, Erik; Karolinska Institutet, Department of Clinical Neuroscience |
| Keywords:                     | Obsessive Compulsive Disorder, Internet delivered Cognitive Behaviour Therapy, Non-inferiority study, Clinical randomized controlled trial, Adult psychiatry < PSYCHIATRY                                                                                                                                                                                                                                                                                                |
|                               |                                                                                                                                                                                                                                                                                                                                                                                                                                                                          |

SCHOLARONE™  
Manuscripts

View Only

Word count: 2882

1  
2  
3  
4  
5  
6  
7  
8  
9  
10  
11  
12  
13  
14  
15  
16  
17  
18  
19  
20  
21  
22  
23  
24  
25  
26  
27  
28  
29  
30  
31  
32  
33  
34  
35  
36  
37  
38  
39  
40  
41  
42  
43  
44  
45  
46  
47  
48  
49  
50  
51  
52  
53  
54  
55  
56  
57  
58  
59  
60

## **Study protocol for a single-blind, randomized controlled, non-inferiority trial of Internet-based versus face-to-face cognitive behaviour therapy for obsessive-compulsive disorder**

Christian Rück<sup>1,2</sup>, Lina Lundström<sup>1,2</sup>, Oskar Flygare<sup>1</sup>, Jesper Enander<sup>1,2</sup>, Matteo Bottai<sup>3</sup>,  
David Mataix-Cols<sup>1,2</sup>, Erik Andersson<sup>1</sup>

<sup>1</sup> Centre for Psychiatry Research, Department of Clinical Neuroscience, Karolinska Institutet, SE-171 77 Stockholm, Sweden; <sup>2</sup> Stockholm Health Care Services, Stockholm County Council, SE-14186 Stockholm, Sweden; <sup>3</sup> Institute of Environmental Medicine, Biostatistics, Karolinska Institutet, SE-171 77 Stockholm, Sweden

Corresponding author:

Christian Rück  
Karolinska Institutet  
M46  
SE-14186 Huddinge  
E-mail: christian.ruck@ki.se  
Telephone: +46704843392

## ABSTRACT

**Introduction** Expert guidelines recommend cognitive behaviour therapy (CBT) as a first line treatment for Obsessive-Compulsive Disorder (OCD) but the majority of patients with OCD do not have access to CBT. Internet-delivered CBT (ICBT) has the potential to make this evidence-based treatment more accessible whilst requiring less therapist time than traditional face-to-face (f2f) CBT. Data from six clinical trials suggests that ICBT for OCD is both efficacious and cost effective but whether ICBT is non-inferior to traditional f2f CBT for OCD is yet unknown.

**Methods and analysis** A single-blind, randomized controlled non-inferiority trial comparing therapist-guided ICBT, unguided ICBT, and individual (f2f) CBT for adult OCD patients. The primary objective is to investigate whether ICBT is non-inferior to gold standard f2f CBT. Secondary objectives are to investigate if ICBT is equally effective when delivered unguided, to establish the cost-effectiveness of ICBT, and to investigate if the treatment outcome differs between self-referred and clinically-referred patients. Participants will be recruited at two specialist OCD clinics in Stockholm, and also through online self-referral. Participants will be randomized to one of three treatment conditions: F2f CBT, ICBT with therapist support or unguided ICBT. The total number of participants will be 120 and masked assessments will be administered at baseline, bi-weekly during treatment, at post-treatment, and at 3- and 12-months follow-ups. The main outcome measure is the clinician-rated Yale-Brown Obsessive Compulsive Scale (Y-BOCS) at 3-month follow-up. The margin of non-inferiority is set to 3 points on the Y-BOCS using a 90% confidence interval.

**Ethics and dissemination** The study has been approved by the Regional Ethics Board of Stockholm (REPN 2015/1099-31/2) and registered at Clinicaltrials.gov (NCT02541968). The study will be reported in accordance with the CONSORT statement for non-pharmacological trials. The results will be published in peer-reviewed academic journals and disseminated to patient organizations and media.

## ARTICLE SUMMARY

- First study evaluating if two modalities of ICBT are non-inferior to the gold standard face-to-face CBT for OCD.
- Full health economic evaluation of therapist-guided ICBT, unguided ICBT and f2f CBT for OCD.
- Recruitment of both clinician and self-referred patients, which will help generalise the results to more typical OCD cases.
- The generalizability to the clinical OCD population may be limited by exclusion of patients fulfilling criteria for severe psychiatric certain comorbid diagnoses, e.g. autism spectrum disorders and psychotic disorders

## INTRODUCTION

Obsessive-Compulsive Disorder (OCD) is a mental disorder characterized by obsessions (e.g., ‘did I really lock that door?’), and compulsions (e.g., repeatedly checking that a door is locked). OCD affects ~2% of the general population(1) and is associated with poor quality of life, functional impairment across multiple life domains, high suicide risk,(2) and a large societal economic burden.(3) The disorder usually onsets before the age of 25 and has a low probability of remission if left untreated.(4)

Cognitive behavioral therapy (CBT) is currently recommended by the NICE guidelines as a first-line treatment for OCD.(5) Unfortunately, there is a gap between supply and demand of CBT for OCD; barriers to treatment access include a shortage of trained CBT therapists,(6) costs associated with treatment, geographical barriers, and embarrassment to openly disclose one’s OCD symptoms.(7) Specialized CBT for OCD is therefore not accessible for most patients and only a minority of sufferers (5-10%) receive this evidence-based treatment.(8)

Internet cognitive behavior therapy (ICBT) has the advantage of being more accessible and requiring less therapist time than face to face (f2f) CBT, potentially resulting in savings for the health care system. In therapist-guided ICBT, the patient logs on to a secure website and works with written self-help materials and homework assignments. During the treatment, the patient receives asynchronous online support by an identified therapist, who motivates the patient and troubleshoots any problems that may occur during the treatment. Therapist-guided ICBT has the potential to increase access to evidence based care and there is a substantial body of work demonstrating that therapist-guided ICBT can increase access to treatment for several mental disorders without impairing efficacy. In a recent meta-analysis where therapist-guided ICBT was compared to face-to-face CBT for both somatic and psychiatric disorders, therapist-guided ICBT was shown to have comparable efficacy to traditional f2f CBT treatment.(9) At the Internet psychiatry unit in Stockholm ([www.internetpsykiatri.se](http://www.internetpsykiatri.se)), the effectiveness of therapist-guided ICBT for psychiatric disorders within clinical psychiatric care has been evaluated with positive long-term effects.(10-12)

Our research group has previously developed and tested therapist-guided ICBT for adults with OCD.(13-16) In a first pilot study of therapist-guided ICBT for OCD (n=23), large within-group effects (d = 1.56) were found for ICBT.(15) In a subsequent RCT (n=101), therapist-guided ICBT was superior to an attention control condition with a large between-group effect size (d = 1.12).(13) The treatment effects were sustained up to two years after treatment.(16) In a third study (n=128), therapist-guided ICBT for OCD, with or without the addition of the partial NMDA-agonist d-cycloserine was investigated. Although no significant effect of d-cycloserine was found, large within-group improvements were observed for both groups: d-cycloserine (d= 1.82) and placebo (d=2.20).(14) Therapist-guided ICBT for OCD has also shown positive results across cultures and age groups. In Australia, Wootton and colleagues and Mahoney and colleagues have both shown therapist-guided ICBT for OCD to be effective in randomized controlled trials.(17, 18) In Germany, Herbst and colleagues have tested therapist-guided ICBT for OCD with positive long-term effects.(19) ICBT is also efficacious and cost effective in adolescents with OCD (20, 21)

There is some evidence to suggest that ICBT can be delivered without any therapist involvement.(18, 22-24) However, this contradicts earlier literature suggesting that OCD patients receiving therapist support have lower attrition and fare better in treatment.(25) If ICBT could be entirely unguided, even more patients could receive help at a minimal cost.

### Remaining evidence gaps that need to be closed

Although multiple research groups have found that therapist-guided ICBT is a promising approach for treating OCD, there are several critical issues that need to be addressed before the implementation of ICBT in a regular health care context can be recommended. **First**, it is unclear if ICBT is non-inferior to gold standard f2f CBT. **Second**, we do not know if our ICBT treatment is equally effective when delivered unguided. **Third**, there are no high-quality cost-effectiveness studies on ICBT for OCD and it is crucial to make a full health economical evaluation of ICBT vs. the gold standard f2f CBT. **Fourth**, the existing studies supporting the efficacy of ICBT in OCD have all relied on self-referred subjects, rather than “real patients” regularly seen in psychiatric clinics; this may affect the generalizability of previous findings.<sup>(26)</sup> **Fifth**, since we do not yet know for whom ICBT is particularly suitable, the identification of reliable predictors and moderators of treatment outcome aid in choosing the right treatment from the start.

### Aims and objectives

#### *Primary objective*

1. Our primary objective is to establish whether ICBT is non-inferior to f2f CBT with regard to OCD symptoms (measured with the masked clinician-rated Yale-Brown Obsessive Compulsive Scale, Y-BOCS).

#### *Secondary objectives*

2. To investigate if ICBT for OCD can be delivered without therapist support without impairing efficacy.
3. To determine if ICBT, compared to f2f CBT, is a cost-effective treatment for OCD.
4. To examine if there is a difference in treatment outcome between self-referred and clinically referred patients.
5. To explore predictors and moderators of treatment outcome as a first step towards personalized treatment selection.

## METHODS AND ANALYSIS

### Study design

Single-blind, randomized controlled non-inferiority trial comparing therapist-guided ICBT, unguided ICBT without therapist support, and individual f2f CBT for OCD in adults. The total number of participants will be 120 (40 per group), with stratification according to source of referral (self- vs. clinic referred patients). Block randomization will be performed within each stratum to ensure all participants are equally represented across treatment conditions. Participants will be assessed at baseline, bi-weekly during treatment, at post-treatment, and at 3- and 12-months follow-ups. The CONSORT flowchart of the trial is depicted in Figure 1.

INSERT FIGURE 1 ABOUT HERE

### Sample selection

Regular patients referred to two OCD specialist clinics in Stockholm will be assessed for eligibility. The trial will also be advertised online so that interested participants can self-refer by registering on the trial's secure webpage and completing a screening questionnaire. People living in Stockholm, Södermanland or Uppsala County are eligible to participate in the study (these counties are within 1 to 2 hours travel distance to Stockholm).

After completing an online screening, a clinical psychologist will contact potentially suitable participants by telephone for a brief screening interview. They will then be offered an appointment with a psychiatrist at one of the two OCD specialist clinic for a full psychiatric assessment. The psychiatrist will administer the Mini International Neuropsychiatric Interview (MINI)(27) and The Structured Clinical Interview for DSM-5 (SCID-5)(28) to confirm the diagnosis of OCD, document psychiatric comorbidities, administer baseline instruments, and decide on inclusion/exclusion. Table 1 lists inclusion and exclusion criteria.

|                           |                                                                                                                         |
|---------------------------|-------------------------------------------------------------------------------------------------------------------------|
| <b>Inclusion criteria</b> | ≥ 18 years of age                                                                                                       |
|                           | Primary diagnosis of OCD according to DSM-5                                                                             |
|                           | Internet access                                                                                                         |
|                           | Written consent of participation in the study                                                                           |
| <b>Exclusion criteria</b> | Other psychological treatment for OCD during the treatment period                                                       |
|                           | Completed CBT for OCD in the last 12 months                                                                             |
|                           | Changes in psychotropic medication within the last two months                                                           |
|                           | Bipolar disorder                                                                                                        |
|                           | Psychosis                                                                                                               |
|                           | Alcohol or substance dependence                                                                                         |
|                           | Autism spectrum disorder                                                                                                |
|                           | Organic brain disorder                                                                                                  |
|                           | Hoarding disorder or OCD with primary hoarding symptoms                                                                 |
|                           | Suicidal ideation                                                                                                       |
|                           | Subjects that lack the ability to read written Swedish or lack the cognitive ability to assimilate the written material |

### Randomization and concealment

The randomization sequence will be generated by Karolinska Trial Alliance (KTA, <https://karolinskatrialliance.se>, an independent entity not involved in the study) before inclusion of the first participant, using masked block randomization. Patients will receive their randomization number based on the order of their first psychiatrist appointment. Patients will be stratified based on self- or clinical referral. Sealed envelopes with information on treatment allocation will be stored in a secure locker in case of emergency unblinding.

Assessors will be blind to group assignment up to the 12- month follow-up. To ensure that the blinding is maintained, patients will be given clear instructions not to disclose which treatment they have been randomized to while being interviewed by the blind assessors. Where blindness is inadvertently broken, raters will be immediately replaced and the participant re-assessed by another rater. Blind raters will be asked to guess each patient's



group allocation at each assessment point.(29) This will establish if the blind raters' guesses regarding treatment allocation were better than chance.

### Interventions

*Therapist-guided ICBT.* Patients will receive 14 weeks of ICBT for OCD using a validated treatment protocol.(13-16) As in regular CBT for OCD, the main treatment component is exposure and response prevention (ERP). The therapists will be licensed psychologists with expertise in treating patients with OCD. Therapists will respond to emails encrypted in the Internet platform within 24 hours on weekdays. Each participant's response rate at the 3-month follow-up will be calculated and monitored by the project leaders. The participants who are non-responders (defined as Y-BOCS reduction < 35% and CGI-I >2)(28) at the 3-month follow-up will be contacted by telephone and offered face-to-face CBT for 14 weeks.

*Self-guided ICBT.* This arm will be identical to the ICBT described above but without any online therapist support. If participants experience any technical problems with the online platform during the treatment, they can contact project leaders for help. In the internet platform, patients will have detailed contact information in case of emergency. Participants in this group who are non-responders at 3-month follow-up will be offered up to 14 weeks of f2f CBT according to the same procedure explained in the previous section.

*Individual f2f CBT.* Patients receive 16 sessions of individual f2f CBT for OCD delivered over a time period of 14 weeks, according to a validated protocol.(30) Sessions will be held twice weekly during the first two weeks and once a week for the remaining 12 weeks. The therapists will be licensed psychologists with expertise in treating patients with OCD. The content of the f2f CBT is the same as in the ICBT arms. Sessions will be audiotaped in order to ensure that the therapists adhere to the treatment protocol. Adherence to protocol will be independently rated by a psychologist (not otherwise involved in the study) specialized in CBT treatment for OCD.

### Sample size calculation

In order to provide accurate estimates for the power calculation in the current trial, we will use individual-level data from a previous study of therapist-guided ICBT with identical Y-BOCS assessments by blinded raters and six repeated observations.(14) To calculate the required sample size, we used a bootstrap simulation with 1000 samples using the following assumptions, based on data from the previous trial: a variance of the random intercept of 10.5, a variance for the random slope of 0.04, and a within- individual residual variance of 20.4. With 3 treatment groups and 8 observations (Y-BOCS) per patient, we estimated that a total of 120 participants would be needed to detect a slope difference between two groups (i.e. group 1 vs. group 2 and group 1 vs. group 3) of 3 points at 3-month follow-up with over 90% power.

### Measurements

Table 2 lists clinician-rated and self-rated assessments at the different time points. The primary outcome measure is the clinician-rated Yale-Brown Obsessive Compulsive Scale (Y-BOCS), the gold standard for assessing the severity of OCD symptoms.(32) Clinicians in this trial will practice together on case examples to establish high inter-rater reliability. The Y-BOCS will be administered by blind raters at baseline, at weeks 2, 4, 6, 8, 10 and 12 during treatment, at post-treatment (week 15), and at 3- and 12-months follow-ups. The primary endpoint is the 3-month follow-up.



Secondary clinician-administered outcome measures are the Clinical Global Impression – Severity and Improvement scale (CGI-S, CGI-I),(33) The Structured Clinical Interview for DSM-5 (SCID-5), obsessive-compulsive and related disorders,(28) and the Global Assessment of Functioning (GAF).(34) Secondary self-rated outcome measures are the Obsessive-Compulsive Inventory (OCI-R),(35) the self-rated Y-BOCS,(32) the Montgomery-Åsberg Depression Rating Scale (MADRS-S),(36) Sheehan Disability Scale (SDS)(37) and the Euroqol (EQ-5D).(38) The Patient Exposure/Responsprevention Adherence Scale (PEAS)(39) will be used to quantify compliance with ERP homework and the Working Alliance Inventory – Short Form (WAI-SF)(40) will be used to measure therapeutic alliance in the face-to-face CBT and ICBT with therapist support treatment conditions. The Insomnia Severity Index (ISI)(41) will be used to measure participants sleep patterns and the Treatment Credibility Scale (TCS)(42) will be used to measure how credible participants perceive the treatment to be. Measurements will be administered before and after treatment as well as during 3- and 12 months follow-ups.

Table 2. Assessments at different time points

|                                    | Screening | Pre treatment | During treatment | Post treatment | 3 month follow-up | 12 month follow-up |
|------------------------------------|-----------|---------------|------------------|----------------|-------------------|--------------------|
| <b>Clinician-rated instruments</b> |           |               |                  |                |                   |                    |
| SCID-5 (OCD)                       | X         | X             |                  | X              | X                 | X                  |
| Y-BOCS                             | X         | X             | X                | X              | X                 | X                  |
| CGI-S                              |           | X             |                  | X              | X                 | X                  |
| CGI-I                              |           |               |                  | X              | X                 | X                  |
| GAF                                |           | X             |                  | X              | X                 | X                  |
| SMURF                              |           |               | X                | X              | X                 | X                  |
| PEAS                               |           |               | X                | X              |                   |                    |
| MADRS-S                            |           |               | X                |                |                   |                    |
| MINI                               |           | X             |                  |                |                   |                    |
| <b>Self-rated instruments</b>      |           |               |                  |                |                   |                    |
| Y-BOCS                             | X         | X             |                  | X              | X                 | X                  |
| Y-BOCS checklist                   | X         |               |                  |                |                   |                    |
| OCI-R                              | X         | X             |                  | X              | X                 | X                  |
| EQ-5D                              | X         | X             |                  | X              | X                 | X                  |
| EQ-5D index                        | X         | X             |                  | X              | X                 | X                  |
| Audit                              | X         |               |                  |                |                   |                    |
| Dudit                              | X         |               |                  |                |                   |                    |
| MADRS-S                            | X         | X             |                  | X              | X                 | X                  |
| PHQ9                               | X         |               |                  |                |                   |                    |
| SDS                                | X         | X             |                  | X              | X                 | X                  |
| ASRS                               | X         |               |                  |                |                   |                    |
| ISI                                |           | X             |                  | X              |                   |                    |
| TiC-P                              |           | X             |                  | X              | X                 | X                  |
| TCS                                |           |               | X                |                |                   |                    |
| WAI-SF                             |           |               | X                | X              |                   |                    |

\* SCID-5, The Structured Clinical Interview for DSM 5; Y-BOCS, Yale-Brown Obsessive Compulsive Scale; CGI-S, Clinical Global Impression-Severity scale; CGI-I, Clinical Global Impression-Improvement scale; GAF, Global Assessment of Functioning; SMURF, Safety Monitoring Uniform Report Form; PEAS, Patient Exposure/Responsprevention Adherence Scale; MADRS-S Montgomery-Åsberg Depression Rating Scale; MINI, Mini International Neuropsychiatric Interview; OCI-R, Obsessive-Compulsive Inventory-Revised; EQ-

5D, EuroQol 5 Dimension scale; AUDIT, Alcohol Use Disorder Identification Test; DUDIT, Drug Use Disorders Identification Test; PHQ9, Patient Health Questionnaire; SDS, Sheehan Disability Scale; ASRS, Adult ADHD Self Report Scale; ISI, Insomnia Severity Index; TIC-P, Treatment Inventory of Costs in Psychiatric Patients; TCS, Treatment Credibility Scale; WAI-SF, Working Alliance Inventory – Short Form.

### Safety and adverse events

Data on adverse events and suicidal ideation will be collected by blinded independent raters bi-weekly during treatment, at post-treatment and at 3- and 12-month follow-up. Adverse events will be collected using a standardized checklist, the Safety Monitoring Uniform Report Form (SMURF).(43) Any serious adverse events (such as suicidality) will be immediately handled according to standardized clinical routines and reported to the PI within 24 hours.

### Statistical analysis

The main outcome analyses will be conducted according to the “intent-to-treat” principle. Mixed-effects regression analyses for repeated measures with maximum likelihood estimation (MLE) of parameters will be used with the assumption that data are missing at random. The latter assumption will be tested. For each outcome measure, the model will include fixed effects of time (baseline, mid-treatment, post-treatment, and 3-month follow-up [primary endpoint]), treatment group (guided ICBT, unguided ICBT, f2f CBT) and an interaction effect of treatment group x time to allow for the differential change between the three groups from baseline to the 3-month follow-up. The models will include individuals’ random intercept and random slope to account for variability between and within participants over time. Within- and between-group effect sizes will be calculated with Cohen’s *d*.(44) Numbers needed to treat will be calculated based on responder status.

Alpha for all analyses will be set at 0.05. Non-inferiority is established when the 90% Wald confidence interval for the difference between treatment conditions excludes the pre-specified margin of inferiority, which is set at 3 points on the Y-BOCS (45, 46). This means that if the upper limit of the 90% confidence interval is less than 3 points, we are 95% confident that ICBT will be non-inferior to f2f CBT-. The non-inferiority hypothesis will be tested of both therapist-guided and self-guided ICBT against the f2f CBT. Additional analyses of the 12-month follow-up data will determine whether the treatment gains are maintained long-term and whether ICBT is non-inferior to f2f CBT at follow-up.

### Cost-effectiveness analysis

Health economic data will be collected using the TIC-P(47) and the Swedish National Patient Register, the Swedish Prescribed Drugs Register and the longitudinal integrated data-base for health insurance and work-related research (LISA). Costs will be analyzed using a societal perspective i.e. including both sick-leave, hospitalizations, service use, medication, etc. and analyzed in relation to outcome (i.e. OCD symptoms and quality-adjusted life years using the Y-BOCS and EQ-5D, respectively). National tariffs will be used to estimate costs from health care visits. Productivity losses will be estimated using gross earnings data from each patient.(48) The treatment costs will be included in the cost estimation.

Cost-effectiveness comparisons will be analyzed using incremental cost-effectiveness ratios. The “net benefit approach” will also be used. This approach estimates the cost-effectiveness depending on different societal willingness-to-pay values for one unit of improvement.(48) Non-parametric bootstrapping (one thousand replications) will be used to estimate the difference between ICBT (guided or unguided) and gold standard f2f CBT.

### **Analysis of predictors and moderators**

Potential predictors (for example source of referral) and their interactions will first be analyzed separately in regression models to identify candidate variables. After identifying potential predictors, they will be entered in a stepwise deletion regression model and also added as interaction terms in the main model. Dependent variables will be Y-BOCS end point score (holding Y-BOCS baseline score as covariate). Possible interaction effects between the predictors will be assessed using signal detection analysis on participants classified as responders.

## **ETHICS AND DISSEMINATION**

The trial will be conducted in compliance with this study protocol, the Declaration of Helsinki and Good Clinical Practice (GCP). Karolinska Trial Alliance (KTA) is an external party that will monitor the study and ensure that the study follows GCP. All professionals involved in the study will attend a course in GCP and get certified by the KTA.

The study has been approved by the Regional Ethics Board of Stockholm (REPN 2015/1099-31/2) and registered at Clinicaltrials.gov (NCT02541968), and will be reported in accordance with the CONSORT statement for non-pharmacological trials.<sup>(49)</sup> Ethical risks are deemed minimal and both f2f CBT and ICBT have well-documented efficacy.

### **Current trial status**

Recruitment of participants started in September 2015 and the last participant is expected to reach the primary end-point (3-month follow-up) in December 2018. Primary data analysis will begin in January 2019. The naturalistic follow-up phase of the trial will continue until June 2019.

## **CONCLUSION**

OCD is associated with significant suffering, loss of function across multiple life domains, high suicide risk, and large societal costs. ICBT has great potential to increase access to evidence-based care for a large group of sufferers that normally do not receive evidence-based psychological treatments. The study outlined in this protocol is the first direct comparison of ICBT and gold standard f2f CBT and is a crucial step before ICBT can be recommended for use within the regular health-care system. The study will provide new insights into the effectiveness of different treatment modalities for OCD and the health economic evaluation will help decision-makers to rationally allocate available resources. Implementation of ICBT in regular healthcare would dramatically increase the availability of effective treatment to those suffering from OCD.

### Contributors

CR and LL wrote the first draft of the paper. All authors: CR, LL, OF, DMC, MB, EA and JE conceived the study and revised the manuscript for relevant scientific content. MB specifically revised the statistical analyses and power calculation sections of the paper. All authors approved the final version of the manuscript.

### Competing interests

All authors declare: no support from any organization for the submitted work; no financial relationships with any organizations that might have an interest in the submitted work in the previous three years; no other relationships or activities that could appear to have influenced the submitted work.

### Funding

This study is funded by the Swedish Research Council (K2013-61P-22168) and the regional agreement on medical training and clinical research (ALF) between Stockholm County Council and Karolinska Institutet.

### FIGURE CAPTIONS

Figure 1. CONSORT-flow diagram

### REFERENCES

1. Fullana MA, Vilagut G, Rojas-Farreras S, Mataix-Cols D, de Graaf R, Demyttenaere K, et al. Obsessive–compulsive symptom dimensions in the general population: Results from an epidemiological study in six European countries. *Journal of Affective Disorders*. 2010;124(3):291-9.
2. Fernández de la Cruz L, Rydell M, Runeson B, D'Onofrio BM, Brander G, Rück C, et al. Suicide in obsessive–compulsive disorder: a population-based study of 36 788 Swedish patients. *Molecular Psychiatry*. 2016;22:1626.
3. Huppert JD, Simpson HB, Nissenson KJ, Liebowitz MR, Foa EB. Quality of life and functional impairment in obsessive–compulsive disorder: a comparison of patients with and without comorbidity, patients in remission, and healthy controls. *Depression and Anxiety*. 2009;26(1):39-45.
4. Rasmussen SA, Eisen JL. Epidemiology of obsessive compulsive disorder. *J Clin Psychiatry*. 1990;51 Suppl:10-3; discussion 4.
5. Obsessive N. Compulsive Disorder: core interventions in the treatment of obsessive–compulsive disorder and body dysmorphic disorder. London: NICE. 2005.
6. Larsson BPM, Kaldo V, Broberg AG. Similarities and differences between practitioners of psychotherapy in Sweden: A comparison of attitudes between psychodynamic, cognitive, cognitive–behavioral, and integrative therapists. *Journal of Psychotherapy Integration*. 2009;19(1):34-66.

- 1  
2  
3 7. Shapiro DA, Cavanagh K, Lomas H. GEOGRAPHIC INEQUITY IN THE  
4 AVAILABILITY OF COGNITIVE BEHAVIOURAL THERAPY IN ENGLAND AND  
5 WALES. *Behavioural and Cognitive Psychotherapy*. 2003;31(2):185-92.
- 6  
7 8. Goodwin R, Koenen KC, Hellman F, Guardino M, Struening E. Helpseeking  
8 and access to mental health treatment for obsessive-compulsive disorder. *Acta Psychiatr*  
9 *Scand*. 2002;106(2):143-9.
- 10  
11 9. Andersson G, Cuijpers P, Carlbring P, Riper H, Hedman E. Guided Internet-  
12 based vs. face-to-face cognitive behavior therapy for psychiatric and somatic disorders: a  
13 systematic review and meta-analysis. *World Psychiatry*. 2014;13(3):288-95.
- 14  
15 10. El Alaoui S, Hedman E, Kaldø V, Hesser H, Kraepelien M, Andersson E, et al.  
16 Effectiveness of Internet-based cognitive-behavior therapy for social anxiety disorder in  
17 clinical psychiatry. *Journal of consulting and clinical psychology*. 2015;83(5):902.
- 18  
19 11. Hedman E, Ljótsson B, Kaldø V, Hesser H, El Alaoui S, Kraepelien M, et al.  
20 Effectiveness of Internet-based cognitive behaviour therapy for depression in routine  
21 psychiatric care. *Journal of Affective Disorders*. 2014;155:49-58.
- 22  
23 12. Hedman E, Ljótsson B, Rück C, Bergström J, Andersson G, Kaldø V, et al.  
24 Effectiveness of Internet-based cognitive behaviour therapy for panic disorder in routine  
25 psychiatric care. *Acta Psychiatrica Scandinavica*. 2013;128(6):457-67.
- 26  
27 13. Andersson E, Enander J, Andren P, Hedman E, Ljotsson B, Hursti T, et al.  
28 Internet-based cognitive behaviour therapy for obsessive-compulsive disorder: a randomized  
29 controlled trial. *Psychol Med*. 2012;42(10):2193-203.
- 30  
31 14. Andersson E, Hedman E, Enander J, Radu Djurfeldt D, Ljotsson B, Cervenka S,  
32 et al. D-Cycloserine vs Placebo as Adjunct to Cognitive Behavioral Therapy for Obsessive-  
33 Compulsive Disorder and Interaction With Antidepressants: A Randomized Clinical Trial.  
34 *JAMA Psychiatry*. 2015;72(7):659-67.
- 35  
36 15. Andersson E, Ljotsson B, Hedman E, Kaldø V, Paxling B, Andersson G, et al.  
37 Internet-based cognitive behavior therapy for obsessive compulsive disorder: a pilot study.  
38 *BMC Psychiatry*. 2011;11:125.
- 39  
40 16. Andersson E, Steneby S, Karlsson K, Ljotsson B, Hedman E, Enander J, et al.  
41 Long-term efficacy of Internet-based cognitive behavior therapy for obsessive-compulsive  
42 disorder with or without booster: a randomized controlled trial. *Psychol Med*.  
43 2014;44(13):2877-87.
- 44  
45 17. Wootton BM, Dear BF, Johnston L, Terides MD, Titov N. Remote treatment of  
46 obsessive-compulsive disorder: A randomized controlled trial. *Journal of Obsessive-  
47 Compulsive and Related Disorders*. 2013;2(4):375-84.
- 48  
49 18. Mahoney AE, Mackenzie A, Williams AD, Smith J, Andrews G. Internet  
50 cognitive behavioural treatment for obsessive compulsive disorder: A randomised controlled  
51 trial. *Behav Res Ther*. 2014;63C:99-106.
- 52  
53 19. Herbst N, Voderholzer U, Thiel N, Schaub R, Knaevelsrud C, Stracke S, et al.  
54 No talking, just writing! Efficacy of an Internet-based cognitive behavioral therapy with  
55 exposure and response prevention in obsessive compulsive disorder. *Psychotherapy and  
56 psychosomatics*. 2014;83(3):165-75.
- 57  
58 20. Lenhard F, Ssegonja R, Andersson E, Feldman I, Ruck C, Mataix-Cols D, et al.  
59 Cost-effectiveness of therapist-guided internet-delivered cognitive behaviour therapy for



- 1  
2  
3 paediatric obsessive-compulsive disorder: results from a randomised controlled trial. *BMJ*  
4 *Open*. 2017;7(5):e015246.
- 5  
6 21. Lenhard F, Andersson E, Mataix-Cols D, Rück C, Vigerland S, Högström J, et  
7 al. Therapist-Guided, Internet-Delivered Cognitive-Behavioral Therapy for Adolescents With  
8 Obsessive-Compulsive Disorder; Randomized Controlled Trial. *Journal of the American*  
9 *Academy of Child & Adolescent Psychiatry*.56(1):10-9.e2.
- 10  
11 22. Hauschildt M, Schröder J, Moritz S. Randomized-controlled trial on a novel  
12 (meta-)cognitive self-help approach for obsessive-compulsive disorder (“myMCT”). *Journal*  
13 *of Obsessive-Compulsive and Related Disorders*. 2016;10:26-34.
- 14  
15 23. Wootton BM, Dear BF, Johnston L, Terides MD, Titov N. Self-guided internet  
16 administered treatment for obsessive-compulsive disorder: Results from two open trials.  
17 *Journal of Obsessive-Compulsive and Related Disorders*. 2014;3(2):102-8.
- 18  
19 24. Wootton BM, Dear BF, Johnston L, Terides MD, Titov N. Self-guided internet-  
20 delivered cognitive behavior therapy (iCBT) for obsessive-compulsive disorder: 12 month  
21 follow-up. *Internet Interventions*. 2015;2(3):243-7.
- 22  
23 25. Kenwright M, Marks I, Graham C, Franses A, Mataix-Cols D. Brief scheduled  
24 phone support from a clinician to enhance computer-aided self-help for obsessive-compulsive  
25 disorder: randomized controlled trial. *J Clin Psychol*. 2005;61(12):1499-508.
- 26  
27 26. Mataix-Cols D, Cameron R, Gega L, Kenwright M, Marks IM. Effect of referral  
28 source on outcome with cognitive-behavior therapy self-help. *Compr Psychiatry*.  
29 2006;47(4):241-5.
- 30  
31 27. Lecrubier Y, Sheehan DV, Weiller E, Amorim P, Bonora I, Harnett Sheehan K,  
32 et al. The Mini International Neuropsychiatric Interview (MINI). A short diagnostic  
33 structured interview: reliability and validity according to the CIDI. *European Psychiatry*.  
34 1997;12(5):224-31.
- 35  
36 28. First MB. Structured Clinical Interview for the DSM (SCID). *The Encyclopedia*  
37 *of Clinical Psychology*: John Wiley & Sons, Inc.; 2014.
- 38  
39 29. Basoglu M, Marks I, Livanou M, Swinson R. Double-blindness procedures,  
40 rater blindness, and ratings of outcome. Observations from a controlled trial. *Arch Gen*  
41 *Psychiatry*. 1997;54(8):744-8.
- 42  
43 30. Yadin E, Foa, E. Lichner, T. . *Exposure and Response (Ritual) Prevention for*  
44 *Obsessive-Compulsive Disorder: Therapist Guide*: Oxford University Press; 2012.
- 45  
46 31. Laird NM, Ware JH. Random-effects models for longitudinal data. *Biometrics*.  
47 1982;38(4):963-74.
- 48  
49 32. Goodman WK, Price LH, Rasmussen SA, Mazure C, Fleischmann RL, Hill CL,  
50 et al. The Yale-Brown Obsessive Compulsive Scale. I. Development, use, and reliability.  
51 *Arch Gen Psychiatry*. 1989;46(11):1006-11.
- 52  
53 33. Guy W. Clinical global impression scale. *The ECDEU Assessment Manual for*  
54 *Psychopharmacology-Revised Volume DHEW Publ No ADM*. 1976;76(338):218-22.
- 55  
56 34. Spitzer RL, Gibbon M, Williams J, Endicott J. Global assessment of functioning  
57 (GAF) scale. *Outcome assessment in clinical practice*. 1996:76-8.
- 58  
59 35. Foa EB, Huppert JD, Leiberg S, Langner R, Kichic R, Hajcak G, et al. The  
60 *Obsessive-Compulsive Inventory: Development and validation of a short version*.  
*Psychological Assessment*. 2002;14(4):485-96.

- 1  
2  
3 36. Svanborg P, Asberg M. A comparison between the Beck Depression Inventory  
4 (BDI) and the self-rating version of the Montgomery Asberg Depression Rating Scale  
5 (MADRS). *J Affect Disord.* 2001;64(2-3):203-16.
- 6  
7 37. Sheehan D. Sheehan disability scale. *Handbook of psychiatric measures.*  
8 2000:113-5.
- 9  
10 38. EuroQol G. EuroQol--a new facility for the measurement of health-related  
11 quality of life. *Health Policy.* 1990;16(3):199-208.
- 12  
13 39. Simpson HB, Maher M, Page JR, Gibbons CJ, Franklin ME, Foa EB.  
14 Development of a Patient Adherence Scale for Exposure and Response Prevention Therapy.  
15 *Behavior therapy.* 2010;41(1):30-7.
- 16  
17 40. Tracey TJK, A. M. . Factor structure of the Working Alliance Inventory.  
18 *Psychological Assessment: A Journal of Consulting and Clinical Psychology.* 1989;1:207-10.
- 19  
20 41. Bastien CH, Vallières A, Morin CM. Validation of the Insomnia Severity Index  
21 as an outcome measure for insomnia research. *Sleep Medicine.*2(4):297-307.
- 22  
23 42. Devilly GJ, Borkovec TD. Psychometric properties of the credibility/expectancy  
24 questionnaire. *Journal of Behavior Therapy and Experimental Psychiatry.* 2000;31(2):73-86.
- 25  
26 43. Greenhill LL, Vitiello B, Fisher P, Levine J, Davies M, Abikoff H, et al.  
27 Comparison of Increasingly Detailed Elicitation Methods for the Assessment of Adverse  
28 Events in Pediatric Psychopharmacology. *Journal of the American Academy of Child &*  
29 *Adolescent Psychiatry.* 2004;43(12):1488-96.
- 30  
31 44. Cohen J. *Statistical power analysis for the behavioural sciences.* Hillside. NJ:  
32 Lawrence Earlbaum Associates. 1988.
- 33  
34 45. Lovell K, Cox D, Haddock G, Jones C, Raines D, Garvey R, et al. Telephone  
35 administered cognitive behaviour therapy for treatment of obsessive compulsive disorder:  
36 randomised controlled non-inferiority trial. *BMJ.* 2006;333(7574):883.
- 37  
38 46. Turner CM, Mataix-Cols D, Lovell K, Krebs G, Lang K, Byford S, et al.  
39 Telephone cognitive-behavioral therapy for adolescents with obsessive-compulsive disorder:  
40 a randomized controlled non-inferiority trial. *J Am Acad Child Adolesc Psychiatry.*  
41 2014;53(12):1298-307 e2.
- 42  
43 47. Hakkaart-van Roijen L, Van Straten A, Donker M, Tiemens B. *Trimbos/iMTA*  
44 *questionnaire for costs associated with psychiatric illness (TIC-P).* Rotterdam: Institute for  
45 *Medical Technology Assessment.* 2002.
- 46  
47 48. Drummond MF, Sculpher MJ, Claxton K, Stoddart GL, Torrance GW. *Methods*  
48 *for the economic evaluation of health care programmes:* Oxford university press; 2015.
- 49  
50 49. Schulz KF, Altman DG, Moher D. CONSORT 2010 Statement: updated  
51 guidelines for reporting parallel group randomised trials. *BMC Medicine.* 2010;8(1):18.
- 52  
53  
54  
55  
56  
57  
58  
59



1  
2  
3  
4  
5  
6  
7  
8  
9  
10  
11  
12  
13  
14  
15  
16  
17  
18  
19  
20  
21  
22  
23  
24  
25  
26  
27  
28  
29  
30  
31  
32  
33  
34  
35  
36  
37  
38  
39  
40  
41  
42  
43  
44  
45  
46  
47  
48  
49  
50  
51  
52  
53  
54  
55  
56  
57  
58  
59  
60

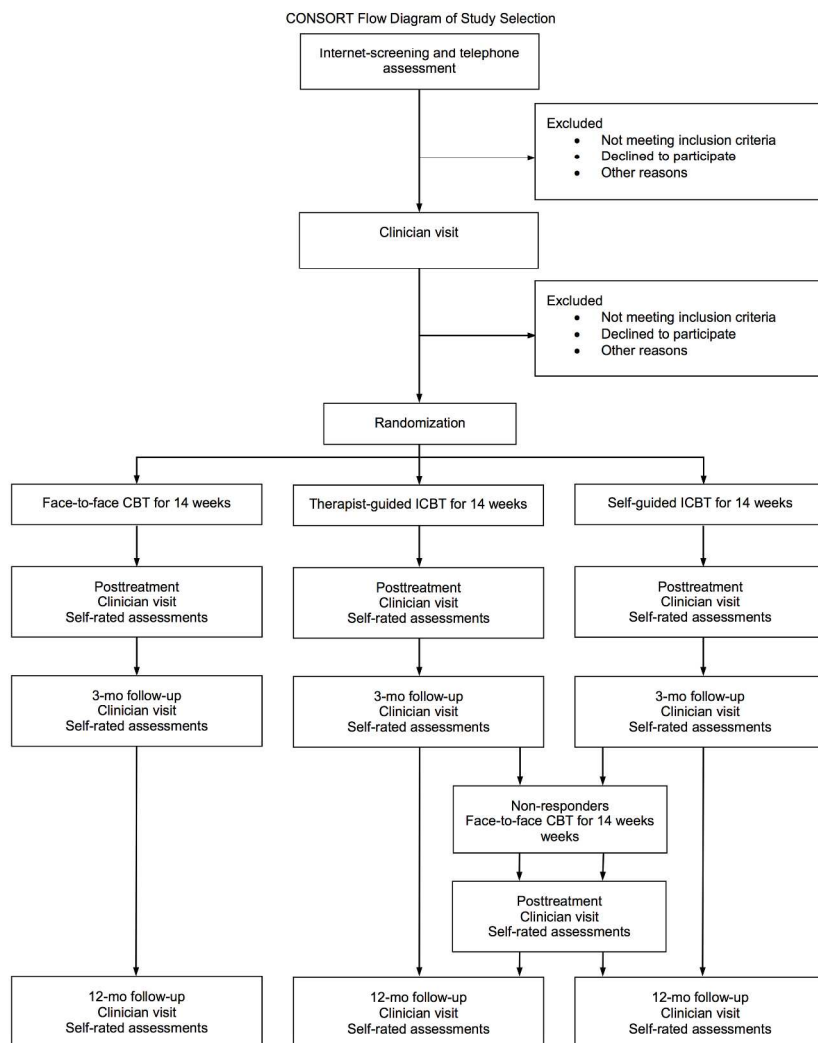

215x279mm (300 x 300 DPI)

## Interim power-analysis by Karolinska Trial Alliance

### Supplement material to “Study protocol for a single-blind, randomized controlled, non- inferiority trial of Internet-based versus face-to-face cognitive behaviour therapy for obsessive-compulsive disorder”

Christian Rück, Lina Lundström, Oskar Flygare, Jesper Enander, Matteo Bottai, David Mataix-Cols, Erik Andersson

To make sure that the study would be informative, without looking at the outcome data ourselves, we requested an interim power-analysis by the *Karolinska Trial Alliance* (KTA). KTA is an independent body that monitors clinical trials and makes sure that researchers follow good clinical practice.

Because our power calculation used variances of regressions coefficients rather than estimates of the coefficients themselves [1], we were able to request estimates on our collected data (80 out of 120 individuals) without including the grouping variable in the data and inadvertently revealing the results. The interim power-analysis would inform us whether the initial power calculation, using data from [2], was accurate or not.

We extracted data needed for the analysis (ID-number and Y-BOCS ratings for all time-points except the 12-month follow-up) and sent to KTA with instructions for how to fit the correct mixed-effects model and obtain variance estimates. We received their report with the following variance estimates:

- Random intercept variance of 12.77
- Random slope variance of 10.02
- Residual variance of 14.10

We then used these estimates in an updated power calculation and concluded that our planned sample size of 120 participants would be sufficient for the study to be informative with a non-inferiority margin of 3 points on the clinician-rated Y-BOCS [3].

### Supplement references

1 Yi Q, Panzarella T. Estimating sample size for tests on trends across repeated measurements with missing data based on the interaction term in a mixed model. *Control Clin Trials* 2002;**23**:481–496. doi: doi.org/10.1016/S0197-2456(02)00223-4

2 Andersson E, Hedman E, Enander J *et al.* D-Cycloserine vs Placebo as Adjunct to Cognitive Behavioral Therapy for Obsessive-Compulsive Disorder and Interaction With Antidepressants. *JAMA Psychiatry* 2015;**72**:659.

1  
2  
3 Goodman WK, Price LH, Rasmussen SA *et al*. The Yale-Brown Obsessive Compulsive Scale.  
4 I. Development, Use, and Reliability. *Arch Gen Psychiatry* 1989;**46**:1012–6.  
5 doi:[10.1001/archpsyc.1989.01810110048007](https://doi.org/10.1001/archpsyc.1989.01810110048007)  
6  
7  
8  
9  
10  
11  
12  
13  
14  
15  
16  
17  
18  
19  
20  
21  
22  
23  
24  
25  
26  
27  
28  
29  
30  
31  
32  
33  
34  
35  
36  
37  
38  
39  
40  
41  
42  
43  
44  
45  
46  
47  
48  
49  
50  
51  
52  
53  
54  
55  
56  
57  
58  
59  
60

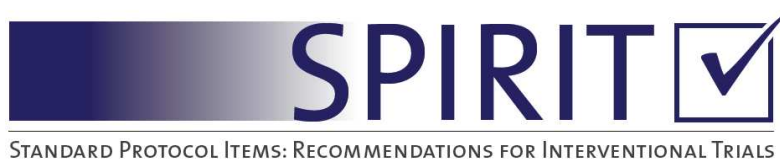

SPIRIT 2013 Checklist: Recommended items to address in a clinical trial protocol and related documents\*

| Section/item                      | Item No | Description                                                                                                                                                                                                                                                                                                 |
|-----------------------------------|---------|-------------------------------------------------------------------------------------------------------------------------------------------------------------------------------------------------------------------------------------------------------------------------------------------------------------|
| <b>Administrative information</b> |         |                                                                                                                                                                                                                                                                                                             |
| Title                             | 1       | Descriptive title identifying the study design, population, interventions, and, if applicable, trial acronym ( <b>page 1</b> )                                                                                                                                                                              |
| Trial registration                | 2a      | Trial identifier and registry name. If not yet registered, name of intended registry ( <b>page 9</b> )                                                                                                                                                                                                      |
|                                   | 2b      | All items from the World Health Organization Trial Registration Data Set                                                                                                                                                                                                                                    |
| Protocol version                  | 3       | Date and version identifier                                                                                                                                                                                                                                                                                 |
| Funding                           | 4       | Sources and types of financial, material, and other support ( <b>page 10</b> )                                                                                                                                                                                                                              |
| Roles and responsibilities        | 5a      | Names, affiliations, and roles of protocol contributors ( <b>page 1,10</b> )                                                                                                                                                                                                                                |
|                                   | 5b      | Name and contact information for the trial sponsor ( <b>page 1</b> )                                                                                                                                                                                                                                        |
|                                   | 5c      | Role of study sponsor and funders, if any, in study design; collection, management, analysis, and interpretation of data; writing of the report; and the decision to submit the report for publication, including whether they will have ultimate authority over any of these activities ( <b>page 10</b> ) |
|                                   | 5d      | Composition, roles, and responsibilities of the coordinating centre, steering committee, endpoint adjudication committee, data management team, and other individuals or groups overseeing the trial, if applicable (see Item 21a for data monitoring committee) ( <b>page 10</b> )                         |
| <b>Introduction</b>               |         |                                                                                                                                                                                                                                                                                                             |
| Background and rationale          | 6a      | Description of research question and justification for undertaking the trial, including summary of relevant studies (published and unpublished) examining benefits and harms for each intervention ( <b>page 3</b> )                                                                                        |
|                                   | 6b      | Explanation for choice of comparators ( <b>page 4</b> )                                                                                                                                                                                                                                                     |
| Objectives                        | 7       | Specific objectives or hypotheses ( <b>page 4</b> )                                                                                                                                                                                                                                                         |

1  
2  
3  
4  
5  
6  
7  
8  
9  
10  
11  
12  
13  
14  
15  
16  
17  
18  
19  
20  
21  
22  
23  
24  
25  
26  
27  
28  
29  
30  
31  
32  
33  
34  
35  
36  
37  
38  
39  
40  
41  
42  
43  
44  
45  
46  
47  
48  
49  
50  
51  
52  
53  
54  
55  
56  
57  
58  
59  
60

|              |   |                                                                                                                                                                                                                             |
|--------------|---|-----------------------------------------------------------------------------------------------------------------------------------------------------------------------------------------------------------------------------|
| Trial design | 8 | Description of trial design including type of trial (eg, parallel group, crossover, factorial, single group), allocation ratio, and framework (eg, superiority, equivalence, noninferiority, exploratory) ( <b>page 4</b> ) |
|--------------|---|-----------------------------------------------------------------------------------------------------------------------------------------------------------------------------------------------------------------------------|

### **Methods: Participants, interventions, and outcomes**

|               |   |                                                                                                                                                                                                      |
|---------------|---|------------------------------------------------------------------------------------------------------------------------------------------------------------------------------------------------------|
| Study setting | 9 | Description of study settings (eg, community clinic, academic hospital) and list of countries where data will be collected. Reference to where list of study sites can be obtained ( <b>page 5</b> ) |
|---------------|---|------------------------------------------------------------------------------------------------------------------------------------------------------------------------------------------------------|

|                      |    |                                                                                                                                                                                                                |
|----------------------|----|----------------------------------------------------------------------------------------------------------------------------------------------------------------------------------------------------------------|
| Eligibility criteria | 10 | Inclusion and exclusion criteria for participants. If applicable, eligibility criteria for study centres and individuals who will perform the interventions (eg, surgeons, psychotherapists) ( <b>page 5</b> ) |
|----------------------|----|----------------------------------------------------------------------------------------------------------------------------------------------------------------------------------------------------------------|

|               |     |                                                                                                                                              |
|---------------|-----|----------------------------------------------------------------------------------------------------------------------------------------------|
| Interventions | 11a | Interventions for each group with sufficient detail to allow replication, including how and when they will be administered ( <b>page 6</b> ) |
|---------------|-----|----------------------------------------------------------------------------------------------------------------------------------------------|

|  |     |                                                                                                                                                                                                                  |
|--|-----|------------------------------------------------------------------------------------------------------------------------------------------------------------------------------------------------------------------|
|  | 11b | Criteria for discontinuing or modifying allocated interventions for a given trial participant (eg, drug dose change in response to harms, participant request, or improving/worsening disease) ( <b>page 6</b> ) |
|--|-----|------------------------------------------------------------------------------------------------------------------------------------------------------------------------------------------------------------------|

|  |     |                                                                                                                                                                     |
|--|-----|---------------------------------------------------------------------------------------------------------------------------------------------------------------------|
|  | 11c | Strategies to improve adherence to intervention protocols, and any procedures for monitoring adherence (eg, drug tablet return, laboratory tests) ( <b>page 6</b> ) |
|--|-----|---------------------------------------------------------------------------------------------------------------------------------------------------------------------|

|  |     |                                                                                                                 |
|--|-----|-----------------------------------------------------------------------------------------------------------------|
|  | 11d | Relevant concomitant care and interventions that are permitted or prohibited during the trial ( <b>page 8</b> ) |
|--|-----|-----------------------------------------------------------------------------------------------------------------|

|          |    |                                                                                                                                                                                                                                                                                                                                                                                                     |
|----------|----|-----------------------------------------------------------------------------------------------------------------------------------------------------------------------------------------------------------------------------------------------------------------------------------------------------------------------------------------------------------------------------------------------------|
| Outcomes | 12 | Primary, secondary, and other outcomes, including the specific measurement variable (eg, systolic blood pressure), analysis metric (eg, change from baseline, final value, time to event), method of aggregation (eg, median, proportion), and time point for each outcome. Explanation of the clinical relevance of chosen efficacy and harm outcomes is strongly recommended ( <b>page 6, 7</b> ) |
|----------|----|-----------------------------------------------------------------------------------------------------------------------------------------------------------------------------------------------------------------------------------------------------------------------------------------------------------------------------------------------------------------------------------------------------|

|                      |    |                                                                                                                                                                                                    |
|----------------------|----|----------------------------------------------------------------------------------------------------------------------------------------------------------------------------------------------------|
| Participant timeline | 13 | Time schedule of enrolment, interventions (including any run-ins and washouts), assessments, and visits for participants. A schematic diagram is highly recommended (see Figure) ( <b>page 4</b> ) |
|----------------------|----|----------------------------------------------------------------------------------------------------------------------------------------------------------------------------------------------------|

|             |    |                                                                                                                                                                                                         |
|-------------|----|---------------------------------------------------------------------------------------------------------------------------------------------------------------------------------------------------------|
| Sample size | 14 | Estimated number of participants needed to achieve study objectives and how it was determined, including clinical and statistical assumptions supporting any sample size calculations ( <b>page 6</b> ) |
|-------------|----|---------------------------------------------------------------------------------------------------------------------------------------------------------------------------------------------------------|

|             |    |                                                                                                       |
|-------------|----|-------------------------------------------------------------------------------------------------------|
| Recruitment | 15 | Strategies for achieving adequate participant enrolment to reach target sample size ( <b>page 5</b> ) |
|-------------|----|-------------------------------------------------------------------------------------------------------|

### **Methods: Assignment of interventions (for controlled trials)**

Allocation:

|    |                |     |                                                                         |
|----|----------------|-----|-------------------------------------------------------------------------|
| 1  |                |     |                                                                         |
| 2  | Sequence       | 16a | Method of generating the allocation sequence (eg, computer-             |
| 3  | generation     |     | generated random numbers), and list of any factors for stratification.  |
| 4  |                |     | To reduce predictability of a random sequence, details of any planned   |
| 5  |                |     | restriction (eg, blocking) should be provided in a separate document    |
| 6  |                |     | that is unavailable to those who enrol participants or assign           |
| 7  |                |     | interventions ( <b>page 5</b> )                                         |
| 8  |                |     |                                                                         |
| 9  | Allocation     | 16b | Mechanism of implementing the allocation sequence (eg, central          |
| 10 | concealment    |     | telephone; sequentially numbered, opaque, sealed envelopes),            |
| 11 | mechanism      |     | describing any steps to conceal the sequence until interventions are    |
| 12 |                |     | assigned ( <b>page 5</b> )                                              |
| 13 |                |     |                                                                         |
| 14 | Implementation | 16c | Who will generate the allocation sequence, who will enrol participants, |
| 15 |                |     | and who will assign participants to interventions ( <b>page 5</b> )     |
| 16 |                |     |                                                                         |
| 17 | Blinding       | 17a | Who will be blinded after assignment to interventions (eg, trial        |
| 18 | (masking)      |     | participants, care providers, outcome assessors, data analysts), and    |
| 19 |                |     | how ( <b>page 5</b> )                                                   |
| 20 |                |     |                                                                         |
| 21 |                | 17b | If blinded, circumstances under which unblinding is permissible, and    |
| 22 |                |     | procedure for revealing a participant's allocated intervention during   |
| 23 |                |     | the trial ( <b>page 5</b> )                                             |
| 24 |                |     |                                                                         |
| 25 |                |     |                                                                         |

#### **Methods: Data collection, management, and analysis**

|    |                 |     |                                                                              |
|----|-----------------|-----|------------------------------------------------------------------------------|
| 26 |                 |     |                                                                              |
| 27 |                 |     |                                                                              |
| 28 | Data collection | 18a | Plans for assessment and collection of outcome, baseline, and other          |
| 29 | methods         |     | trial data, including any related processes to promote data quality (eg,     |
| 30 |                 |     | duplicate measurements, training of assessors) and a description of          |
| 31 |                 |     | study instruments (eg, questionnaires, laboratory tests) along with          |
| 32 |                 |     | their reliability and validity, if known. Reference to where data            |
| 33 |                 |     | collection forms can be found, if not in the protocol ( <b>page 6,7</b> )    |
| 34 |                 |     |                                                                              |
| 35 |                 | 18b | Plans to promote participant retention and complete follow-up,               |
| 36 |                 |     | including list of any outcome data to be collected for participants who      |
| 37 |                 |     | discontinue or deviate from intervention protocols                           |
| 38 |                 |     |                                                                              |
| 39 | Data            | 19  | Plans for data entry, coding, security, and storage, including any           |
| 40 | management      |     | related processes to promote data quality (eg, double data entry;            |
| 41 |                 |     | range checks for data values). Reference to where details of data            |
| 42 |                 |     | management procedures can be found, if not in the protocol ( <b>page 8</b> ) |
| 43 |                 |     |                                                                              |
| 44 |                 |     |                                                                              |
| 45 | Statistical     | 20a | Statistical methods for analysing primary and secondary outcomes.            |
| 46 | methods         |     | Reference to where other details of the statistical analysis plan can be     |
| 47 |                 |     | found, if not in the protocol ( <b>page 8</b> )                              |
| 48 |                 |     |                                                                              |
| 49 |                 | 20b | Methods for any additional analyses (eg, subgroup and adjusted               |
| 50 |                 |     | analyses) ( <b>page 8</b> )                                                  |
| 51 |                 |     |                                                                              |
| 52 |                 | 20c | Definition of analysis population relating to protocol non-adherence         |
| 53 |                 |     | (eg, as randomised analysis), and any statistical methods to handle          |
| 54 |                 |     | missing data (eg, multiple imputation) ( <b>page 8</b> )                     |
| 55 |                 |     |                                                                              |
| 56 |                 |     |                                                                              |
| 57 |                 |     |                                                                              |
| 58 |                 |     |                                                                              |
| 59 |                 |     |                                                                              |
| 60 |                 |     |                                                                              |

## Methods: Monitoring

- 1  
2  
3  
4  
5  
6  
7  
8  
9  
10  
11  
12  
13  
14  
15  
16  
17  
18  
19  
20  
21  
22
- |                 |     |                                                                                                                                                                                                                                                                                                                                                         |
|-----------------|-----|---------------------------------------------------------------------------------------------------------------------------------------------------------------------------------------------------------------------------------------------------------------------------------------------------------------------------------------------------------|
| Data monitoring | 21a | Composition of data monitoring committee (DMC); summary of its role and reporting structure; statement of whether it is independent from the sponsor and competing interests; and reference to where further details about its charter can be found, if not in the protocol. Alternatively, an explanation of why a DMC is not needed ( <b>page 5</b> ) |
|                 | 21b | Description of any interim analyses and stopping guidelines, including who will have access to these interim results and make the final decision to terminate the trial                                                                                                                                                                                 |
| Harms           | 22  | Plans for collecting, assessing, reporting, and managing solicited and spontaneously reported adverse events and other unintended effects of trial interventions or trial conduct ( <b>page 8</b> )                                                                                                                                                     |
| Auditing        | 23  | Frequency and procedures for auditing trial conduct, if any, and whether the process will be independent from investigators and the sponsor                                                                                                                                                                                                             |

## Ethics and dissemination

- 23  
24  
25  
26  
27  
28  
29  
30  
31  
32  
33  
34  
35  
36  
37  
38  
39  
40  
41  
42  
43  
44  
45  
46  
47  
48  
49  
50  
51  
52  
53  
54  
55  
56  
57  
58  
59  
60
- |                               |     |                                                                                                                                                                                                                                  |
|-------------------------------|-----|----------------------------------------------------------------------------------------------------------------------------------------------------------------------------------------------------------------------------------|
| Research ethics approval      | 24  | Plans for seeking research ethics committee/institutional review board (REC/IRB) approval ( <b>page 9</b> )                                                                                                                      |
| Protocol amendments           | 25  | Plans for communicating important protocol modifications (eg, changes to eligibility criteria, outcomes, analyses) to relevant parties (eg, investigators, REC/IRBs, trial participants, trial registries, journals, regulators) |
| Consent or assent             | 26a | Who will obtain informed consent or assent from potential trial participants or authorised surrogates, and how (see Item 32)                                                                                                     |
|                               | 26b | Additional consent provisions for collection and use of participant data and biological specimens in ancillary studies, if applicable                                                                                            |
| Confidentiality               | 27  | How personal information about potential and enrolled participants will be collected, shared, and maintained in order to protect confidentiality before, during, and after the trial                                             |
| Declaration of interests      | 28  | Financial and other competing interests for principal investigators for the overall trial and each study site ( <b>page 9</b> )                                                                                                  |
| Access to data                | 29  | Statement of who will have access to the final trial dataset, and disclosure of contractual agreements that limit such access for investigators                                                                                  |
| Ancillary and post-trial care | 30  | Provisions, if any, for ancillary and post-trial care, and for compensation to those who suffer harm from trial participation                                                                                                    |



|   |                         |     |                                                                                                                                                                                                                                                                                     |
|---|-------------------------|-----|-------------------------------------------------------------------------------------------------------------------------------------------------------------------------------------------------------------------------------------------------------------------------------------|
| 1 | Dissemination<br>policy | 31a | Plans for investigators and sponsor to communicate trial results to participants, healthcare professionals, the public, and other relevant groups (eg, via publication, reporting in results databases, or other data sharing arrangements), including any publication restrictions |
| 2 |                         | 31b | Authorship eligibility guidelines and any intended use of professional writers                                                                                                                                                                                                      |
| 3 |                         | 31c | Plans, if any, for granting public access to the full protocol, participant-level dataset, and statistical code                                                                                                                                                                     |

## Appendices

|   |                               |    |                                                                                                                                                                                                |
|---|-------------------------------|----|------------------------------------------------------------------------------------------------------------------------------------------------------------------------------------------------|
| 4 | Informed consent<br>materials | 32 | Model consent form and other related documentation given to participants and authorised surrogates                                                                                             |
| 5 |                               | 33 | Plans for collection, laboratory evaluation, and storage of biological specimens for genetic or molecular analysis in the current trial and for future use in ancillary studies, if applicable |

---

\*It is strongly recommended that this checklist be read in conjunction with the SPIRIT 2013 Explanation & Elaboration for important clarification on the items. Amendments to the protocol should be tracked and dated. The SPIRIT checklist is copyrighted by the SPIRIT Group under the Creative Commons "[Attribution-NonCommercial-NoDerivs 3.0 Unported](https://creativecommons.org/licenses/by-nc-nd/3.0/)" license.

# BMJ Open

## Study protocol for a single-blind, randomized controlled, non-inferiority trial of Internet-based versus face-to-face cognitive behaviour therapy for obsessive-compulsive disorder

|                                 |                                                                                                                                                                                                                                                                                                                                                                                                                                                                          |
|---------------------------------|--------------------------------------------------------------------------------------------------------------------------------------------------------------------------------------------------------------------------------------------------------------------------------------------------------------------------------------------------------------------------------------------------------------------------------------------------------------------------|
| Journal:                        | <i>BMJ Open</i>                                                                                                                                                                                                                                                                                                                                                                                                                                                          |
| Manuscript ID                   | bmjopen-2018-022254.R1                                                                                                                                                                                                                                                                                                                                                                                                                                                   |
| Article Type:                   | Protocol                                                                                                                                                                                                                                                                                                                                                                                                                                                                 |
| Date Submitted by the Author:   | 04-Jun-2018                                                                                                                                                                                                                                                                                                                                                                                                                                                              |
| Complete List of Authors:       | Rück, Christian; Karolinska Institutet, Department of Clinical Neuroscience<br>Lundström, Lina; Karolinska Institutet Department of Clinical Neuroscience<br>Flygare, Oskar; Karolinska Institutet Department of Clinical Neuroscience<br>Enander, Jesper<br>Bottai, Matteo; Karolinska Institutet, IMM<br>Mataix-Cols, David; Karolinska Institutet, Department of Clinical Neuroscience<br>Andersson, Erik; Karolinska Institutet, Department of Clinical Neuroscience |
| <b>Primary Subject Heading</b>: | Mental health                                                                                                                                                                                                                                                                                                                                                                                                                                                            |
| Secondary Subject Heading:      | Health services research                                                                                                                                                                                                                                                                                                                                                                                                                                                 |
| Keywords:                       | Obsessive Compulsive Disorder, Internet delivered Cognitive Behaviour Therapy, Non-inferiority study, Clinical randomized controlled trial, Adult psychiatry < PSYCHIATRY                                                                                                                                                                                                                                                                                                |
|                                 |                                                                                                                                                                                                                                                                                                                                                                                                                                                                          |

SCHOLARONE™  
Manuscripts

Word count: 3497

1  
2  
3  
4  
5  
6  
7  
8  
9  
10  
11  
12  
13  
14  
15  
16  
17  
18  
19  
20  
21  
22  
23  
24  
25  
26  
27  
28  
29  
30  
31  
32  
33  
34  
35  
36  
37  
38  
39  
40  
41  
42  
43  
44  
45  
46  
47  
48  
49  
50  
51  
52  
53  
54  
55  
56  
57  
58  
59  
60

## **Study protocol for a single-blind, randomized controlled, non-inferiority trial of Internet-based versus face-to-face cognitive behaviour therapy for obsessive-compulsive disorder**

Christian Rück<sup>1,2</sup>, Lina Lundström<sup>1,2</sup>, Oskar Flygare<sup>1</sup>, Jesper Enander<sup>1,2</sup>, Matteo Bottai<sup>3</sup>,  
David Mataix-Cols<sup>1,2</sup>, Erik Andersson<sup>1</sup>

<sup>1</sup> Centre for Psychiatry Research, Department of Clinical Neuroscience, Karolinska Institutet, SE-171 77 Stockholm, Sweden; <sup>2</sup> Stockholm Health Care Services, Stockholm County Council, SE-14186 Stockholm, Sweden; <sup>3</sup> Institute of Environmental Medicine, Biostatistics, Karolinska Institutet, SE-171 77 Stockholm, Sweden

Corresponding author:

Christian Rück  
Karolinska Institutet  
M46  
SE-14186 Huddinge  
E-mail: christian.ruck@ki.se  
Telephone: +46704843392

## ABSTRACT

**Introduction** Expert guidelines recommend cognitive behaviour therapy (CBT) as a first line treatment for Obsessive-Compulsive Disorder (OCD) but the majority of patients with OCD do not have access to CBT. Internet-delivered CBT (ICBT) has the potential to make this evidence-based treatment more accessible whilst requiring less therapist time than traditional face-to-face (f2f) CBT. Data from six clinical trials suggests that ICBT for OCD is both efficacious and cost effective but whether ICBT is non-inferior to traditional f2f CBT for OCD is yet unknown.

**Methods and analysis** A single-blind, randomized controlled non-inferiority trial comparing therapist-guided ICBT, unguided ICBT, and individual (f2f) CBT for adult OCD patients. The primary objective is to investigate whether ICBT is non-inferior to gold standard f2f CBT. Secondary objectives are to investigate if ICBT is equally effective when delivered unguided, to establish the cost-effectiveness of ICBT, and to investigate if the treatment outcome differs between self-referred and clinically-referred patients. Participants will be recruited at two specialist OCD clinics in Stockholm, and also through online self-referral. Participants will be randomized to one of three treatment conditions: F2f CBT, ICBT with therapist support or unguided ICBT. The total number of participants will be 120 and masked assessments will be administered at baseline, bi-weekly during treatment, at post-treatment, and at 3- and 12-months follow-ups. The main outcome measure is the clinician-rated Yale-Brown Obsessive Compulsive Scale (Y-BOCS) at 3-month follow-up. The margin of non-inferiority is set to 3 points on the Y-BOCS using a 90% confidence interval.

**Ethics and dissemination** The study has been approved by the Regional Ethics Board of Stockholm (REPN 2015/1099-31/2) and registered at Clinicaltrials.gov (NCT02541968). The study will be reported in accordance with the CONSORT statement for non-pharmacological trials. The results will be published in peer-reviewed academic journals and disseminated to patient organizations and media.

## ARTICLE SUMMARY

- First study evaluating if two modalities of ICBT are non-inferior to the gold standard face-to-face CBT for OCD.
- Full health economic evaluation of therapist-guided ICBT, unguided ICBT and f2f CBT for OCD.
- Recruitment of both clinic-referred and self-referred patients, which will help generalise the results to more typical OCD cases.
- The exclusion of participants with certain diagnoses, e.g. people with Autism Spectrum Disorder, limits the generalizability.

## INTRODUCTION

Obsessive-Compulsive Disorder (OCD) is a mental disorder characterized by obsessions (e.g., 'did I really lock that door?'), and compulsions (e.g., repeatedly checking that a door is locked). OCD affects ~2% of the general population(1) and is associated with poor quality of life, functional impairment across multiple life domains, high suicide risk,(2) and a large societal economic burden.(3) The disorder usually onsets before the age of 25 and has a low probability of remission if left untreated.(4)

Cognitive behavioural therapy (CBT) is currently recommended by the NICE guidelines as a first-line treatment for OCD.(5) Unfortunately, there is a gap between supply and demand of CBT for OCD; barriers to treatment access include a shortage of trained CBT therapists,(6) costs associated with treatment, geographical barriers, and embarrassment to openly disclose one's OCD symptoms.(7) Specialized CBT for OCD is therefore not accessible for most patients and only a minority of sufferers (5-10%) receive this evidence-based treatment.(8)

Internet cognitive behaviour therapy (ICBT) has the advantage of being more accessible and requiring less therapist time than face to face (f2f) CBT, potentially resulting in savings for the health care system. In therapist-guided ICBT, the patient logs on to a secure website and works with written self-help materials and homework assignments. During the treatment, the patient receives asynchronous online support by an identified therapist, who motivates the patient and troubleshoots any problems that may occur during the treatment. Therapist-guided ICBT has the potential to increase access to evidence based care and there is a substantial body of work demonstrating that therapist-guided ICBT can increase access to treatment for several mental disorders without impairing efficacy. In a recent meta-analysis where therapist-guided ICBT was compared to face-to-face CBT for both somatic and psychiatric disorders, therapist-guided ICBT was shown to have comparable efficacy to traditional f2f CBT treatment.(9) At the Internet psychiatry unit in Stockholm ([www.internetpsykiatri.se](http://www.internetpsykiatri.se)), the effectiveness of therapist-guided ICBT for psychiatric disorders within clinical psychiatric care has been evaluated with positive long-term effects.(10-12)

Our research group has previously developed and tested therapist-guided ICBT for adults with OCD.(13-16) In a first pilot study of therapist-guided ICBT for OCD (n=23), large within-group effects (d = 1.56) were found for ICBT.(15) In a subsequent RCT (n=101), therapist-guided ICBT was superior to an attention control condition with a large between-group effect size (d = 1.12).(13) The treatment effects were sustained up to two years after treatment.(16) In a third study (n=128), therapist-guided ICBT for OCD, with or without the addition of the partial NMDA-agonist d-cycloserine was investigated. Although no significant effect of d-cycloserine was found, large within-group improvements were observed for both groups: d-cycloserine (d= 1.82) and placebo (d=2.20).(14) Therapist-guided ICBT for OCD has also shown positive results across cultures and age groups. In Australia, Wootton and colleagues and Mahoney and colleagues have both shown therapist-guided ICBT for OCD to be effective in randomized controlled trials.(17, 18) In Germany, Herbst and colleagues have tested therapist-guided ICBT for OCD with positive long-term effects.(19) ICBT is also efficacious and cost effective in adolescents with OCD (20, 21)

There is some evidence to suggest that ICBT can be delivered without any therapist involvement.(18, 22-24) However, this contradicts earlier literature suggesting that OCD patients receiving therapist support have lower attrition and fare better in treatment.(25) If ICBT could be entirely unguided, even more patients could receive help at a minimal cost.

### Remaining evidence gaps that need to be closed

Although multiple research groups have found that therapist-guided ICBT is a promising approach for treating OCD, there are several critical issues that need to be addressed before the implementation of ICBT in a regular health care context can be recommended. **First**, it is unclear if ICBT is non-inferior to gold standard f2f CBT. **Second**, we do not know if our ICBT treatment is equally effective when delivered unguided. **Third**, there are no high-quality cost-effectiveness studies on ICBT for OCD and it is crucial to make a full health economical evaluation of ICBT vs. the gold standard f2f CBT. **Fourth**, the existing studies supporting the efficacy of ICBT in OCD have all relied on self-referred subjects. Self-referred subjects may be less complex, have better insight into their difficulties and be more motivated for treatment and therefore potentially affecting the generalizability of previous findings.<sup>(26)</sup> **Fifth**, since we do not yet know for whom ICBT is particularly suitable, the identification of reliable predictors and moderators of treatment outcome aid in choosing the right treatment from the start.

### Aims and objectives

#### *Primary objective*

1. Our primary objective is to establish whether ICBT is non-inferior to f2f CBT with regard to OCD symptoms (measured with the masked clinician-rated Yale-Brown Obsessive Compulsive Scale, Y-BOCS).

#### *Secondary objectives*

2. To investigate if ICBT for OCD can be delivered without therapist support without impairing efficacy.
3. To determine if ICBT, compared to f2f CBT, is a cost-effective treatment for OCD.
4. To examine if there is a difference in treatment outcome between self-referred and clinically referred patients.
5. To explore predictors and moderators of treatment outcome as a first step towards personalized treatment selection.

## METHODS AND ANALYSIS

### Study design

Single-blind, randomized controlled non-inferiority trial comparing therapist-guided ICBT, unguided ICBT without therapist support, and individual f2f CBT for OCD in adults. The total number of participants will be 120 (40 per group), with stratification according to source of referral (self- vs. clinic referred patients). Block randomization will be performed within each stratum to ensure all participants are equally represented across treatment conditions. Participants will be assessed at baseline, bi-weekly during treatment, at post-treatment, and at 3- and 12-months follow-ups. The CONSORT flowchart of the trial is depicted in Figure 1.

INSERT FIGURE 1 ABOUT HERE

### Sample selection

Regular patients referred to two OCD specialist clinics in Stockholm will be assessed for eligibility. The trial will also be advertised online so that interested participants can self-refer by registering on the trial's secure webpage and completing a screening questionnaire. People living in Stockholm, Södermanland or Uppsala County are eligible to participate in the study (these counties are within 1 to 2 hours travel distance to Stockholm).

After completing an online screening, a clinical psychologist will contact potentially suitable participants by telephone for a brief screening interview. They will then be offered an appointment with a psychiatrist at one of the two OCD specialist clinic for a full psychiatric assessment. The psychiatrist will administer the Mini International Neuropsychiatric Interview (MINI)(27) and The Structured Clinical Interview for DSM-5 (SCID-5)(28) to confirm the diagnosis of OCD, document psychiatric comorbidities, administer baseline instruments, and decide on inclusion/exclusion. Table 1 lists inclusion and exclusion criteria.

**Table 1. Overview of inclusion and exclusion criteria**

|                           |                                                                                                                         |
|---------------------------|-------------------------------------------------------------------------------------------------------------------------|
| <b>Inclusion criteria</b> | ≥ 18 years of age                                                                                                       |
|                           | Primary diagnosis of OCD according to DSM-5                                                                             |
|                           | Internet access                                                                                                         |
|                           | Written consent of participation in the study                                                                           |
| <b>Exclusion criteria</b> | Other psychological treatment for OCD during the treatment period                                                       |
|                           | Completed CBT for OCD in the last 12 months                                                                             |
|                           | Changes in psychotropic medication within the last two months                                                           |
|                           | Bipolar disorder                                                                                                        |
|                           | Psychosis                                                                                                               |
|                           | Alcohol or substance dependence                                                                                         |
|                           | Autism spectrum disorder                                                                                                |
|                           | Organic brain disorder                                                                                                  |
|                           | Hoarding disorder or OCD with primary hoarding symptoms                                                                 |
|                           | Suicidal ideation                                                                                                       |
|                           | Subjects that lack the ability to read written Swedish or lack the cognitive ability to assimilate the written material |

### Randomization and concealment

The randomization sequence will be generated by Karolinska Trial Alliance (KTA, <https://karolinskatrialliance.se>, an independent entity not involved in the study) before inclusion of the first participant, using masked block randomization. Patients will receive their randomization number based on the order of their first psychiatrist appointment. Patients will be stratified based on self- or clinical referral. Sealed envelopes with information on treatment allocation will be stored in a secure locker in case of emergency unblinding.

Assessors will be blind to group assignment up to the 12- month follow-up. To ensure that the blinding is maintained, patients will be given clear instructions not to disclose which treatment they have been randomized to while being interviewed by the blind assessors. Where blindness is inadvertently broken, raters will be immediately replaced and the participant re-assessed by another rater. Blind raters will be asked to guess each patient's group allocation at each assessment point.(29) This will establish if the blind raters' guesses regarding treatment allocation were better than chance.



## Interventions

*Therapist-guided ICBT.* Patients will receive 14 weeks of ICBT for OCD using a validated treatment protocol.(13-16) As in regular CBT for OCD, the main treatment component is exposure and response prevention (ERP). The therapists will be licensed psychologists with expertise in treating patients with OCD. Therapists will respond to messages encrypted in the Internet platform at a set time during office hours (8am-5pm) on weekdays, in order to ensure that participants receive a response within 24 hours. Each participant's response rate at the 3-month follow-up will be calculated and monitored by the project leaders. The participants who are non-responders (defined as Y-BOCS reduction < 35% and CGI-I >2)(30) at the 3-month follow-up will be contacted by telephone and offered face-to-face CBT for 14 weeks.

*Self-guided ICBT.* This arm will be identical to the ICBT described above but without any online therapist support. If participants experience any technical problems with the online platform during the treatment, they can contact project leaders for help. In the internet platform, patients will have detailed contact information in case of emergency. Participants in this group who are non-responders at 3-month follow-up will be offered up to 14 weeks of f2f CBT according to the same procedure explained in the previous section.

*Individual f2f CBT.* Patients receive 16 sessions of individual f2f CBT for OCD delivered over a time period of 14 weeks, according to a validated protocol.(31) Sessions will be held twice weekly during the first two weeks and once a week for the remaining 12 weeks. The therapists will be licensed psychologists with expertise in treating patients with OCD. The content of the f2f CBT is the same as in the ICBT arms. Sessions will be audiotaped in order to ensure that the therapists adhere to the treatment protocol. Adherence to protocol will be independently rated by a psychologist (not otherwise involved in the study) specialized in CBT treatment for OCD.

## Sample size calculation

In order to provide accurate estimates for the power calculation in the current trial, we will use individual-level data from a previous study of therapist-guided ICBT with identical Y-BOCS assessments by blinded raters and six repeated observations.(14) To calculate the required sample size, we used a bootstrap simulation with 1000 samples using the following assumptions, based on data from the previous trial: a variance of the random intercept of 10.5, a variance for the random slope of 0.04, and a within- individual residual variance of 20.4. With 3 treatment groups and 8 observations (Y-BOCS) per patient, we estimated that a total of 120 participants would be needed to detect a slope difference between two groups (i.e. group 1 vs. group 2 and group 1 vs. group 3) of 3 points at 3-month follow-up with over 90% power. We will request an interim power analysis by the Karolinska Trial Alliance to test these assumptions, using data from 80 individuals, and adjust sample size if power is lower than anticipated (see supplementary file 1 for a detailed description).

## Measurements

Table 2 lists clinician-rated and self-rated assessments at the different time points. The primary outcome measure is the clinician-rated Yale-Brown Obsessive Compulsive Scale (Y-BOCS), the gold standard for assessing the severity of OCD symptoms.(32) Clinicians in this trial will practice together on case examples to establish high inter-rater reliability. The Y-BOCS will be administered by blind raters at baseline, at weeks 2, 4, 6, 8, 10 and 12 during treatment, at post-treatment (week 15), and at 3- and 12-months follow-ups. The primary endpoint is the 3-month follow-up.

Secondary clinician-administered outcome measures are the Clinical Global Impression – Severity and Improvement scale (CGI-S, CGI-I),(33) the Structured Clinical Interview for DSM-5 (SCID-5), obsessive-compulsive and related disorders,(28) and the Global Assessment of Functioning (GAF).(34) Secondary self-rated outcome measures are the Obsessive-Compulsive Inventory (OCI-R),(35) the self-rated Y-BOCS,(32) the Montgomery-Åsberg Depression Rating Scale (MADRS-S),(36) Sheehan Disability Scale (SDS)(37) and the Euroqol (EQ-5D).(38) The Patient Exposure/Responsiveness Adherence Scale (PEAS)(39) will be used to quantify compliance with ERP homework and the Working Alliance Inventory – Short Form (WAI-SF)(40) will be used to measure therapeutic alliance in the face-to-face CBT and ICBT with therapist support treatment conditions. The Insomnia Severity Index (ISI)(41) will be used to measure participants sleep patterns and the Treatment Credibility Scale (TCS)(42) will be used to measure how credible participants perceive the treatment to be. Measurements will be administered before and after treatment as well as during 3- and 12 months follow-ups. In order to increase participant retention at follow-up assessments, participants will be notified via text message 48 hours prior to an appointment. Should a participant not attend a follow-up session, a psychiatrist will contact participants via telephone to perform the assessments.

|                                    | Screening | Pre treatment | During treatment | Post treatment | 3 month follow-up | 12 month follow-up |
|------------------------------------|-----------|---------------|------------------|----------------|-------------------|--------------------|
| <b>Clinician-rated instruments</b> |           |               |                  |                |                   |                    |
| SCID-5 (OCD)                       | X         | X             |                  | X              | X                 | X                  |
| Y-BOCS                             | X         | X             | X                | X              | X                 | X                  |
| CGI-S                              |           | X             |                  | X              | X                 | X                  |
| CGI-I                              |           |               |                  | X              | X                 | X                  |
| GAF                                |           | X             |                  | X              | X                 | X                  |
| SMURF                              |           |               | X                | X              | X                 | X                  |
| PEAS                               |           |               | X                | X              |                   |                    |
| MADRS-S                            |           |               | X                |                |                   |                    |
| MINI                               |           | X             |                  |                |                   |                    |
| <b>Self-rated instruments</b>      |           |               |                  |                |                   |                    |
| Y-BOCS                             | X         | X             |                  | X              | X                 | X                  |
| Y-BOCS checklist                   | X         |               |                  |                |                   |                    |
| OCI-R                              | X         | X             |                  | X              | X                 | X                  |
| EQ-5D                              | X         | X             |                  | X              | X                 | X                  |
| EQ-5D index                        | X         | X             |                  | X              | X                 | X                  |
| Audit                              | X         |               |                  |                |                   |                    |
| Dudit                              | X         |               |                  |                |                   |                    |
| MADRS-S                            | X         | X             |                  | X              | X                 | X                  |
| PHQ9                               | X         |               |                  |                |                   |                    |
| SDS                                | X         | X             |                  | X              | X                 | X                  |
| ASRS                               | X         |               |                  |                |                   |                    |
| ISI                                |           | X             |                  | X              |                   |                    |
| TiC-P                              |           | X             |                  | X              | X                 | X                  |
| TCS                                |           |               | X                |                |                   |                    |
| WAI-SF                             |           |               | X                | X              |                   |                    |

\* SCID-5, The Structured Clinical Interview for DSM 5; Y-BOCS, Yale-Brown Obsessive Compulsive Scale; CGI-S, Clinical Global Impression-Severity scale; CGI-I, Clinical Global Impression-Improvement scale; GAF, Global Assessment of Functioning; SMURF, Safety Monitoring Uniform Report Form; PEAS, Patient

1  
2  
3 Exposure/Responsiveness Adherence Scale; MADRS-S Montgomery-Åsberg Depression Rating Scale;  
4 MINI, Mini International Neuropsychiatric Interview; OCI-R, Obsessive-Compulsive Inventory-Revised; EQ-  
5 5D, EuroQol 5 Dimension scale; AUDIT, Alcohol Use Disorder Identification Test; DUDIT, Drug Use  
6 Disorders Identification Test; PHQ9, Patient Health Questionnaire; SDS, Sheehan Disability Scale; ASRS, Adult  
7 ADHD Self Report Scale; ISI, Insomnia Severity Index; TIC-P, Treatment Inventory of Costs in Psychiatric  
8 Patients; TCS, Treatment Credibility Scale; WAI-SF, Working Alliance Inventory – Short Form.  
9

### 10 11 **Safety and adverse events**

12 Data on adverse events and suicidal ideation will be collected by blinded independent raters  
13 bi-weekly during treatment, at post-treatment and at 3- and 12-month follow-up. Adverse  
14 events will be collected using a standardized checklist, the Safety Monitoring Uniform Report  
15 Form (SMURF).(43) If a participant expresses suicidal ideation (i.e. a score on item 9 of the  
16 MADRS-S  $\geq 4$ ), assessors will initiate a structured suicide risk assessment. If there is an  
17 urgent need for psychiatric care, a trial psychiatrist will contact participants to schedule a  
18 face-to-face appointment as soon as possible.  
19

### 20 21 **Statistical analysis**

22 The main outcome analyses will be conducted according to the “intent-to-treat” principle.  
23 Mixed-effects regression analyses for repeated measures with maximum likelihood estimation  
24 (MLE) of parameters will be used with the assumption that data are missing at random. The  
25 latter assumption will be tested. For each outcome measure, the model will include fixed  
26 effects of time (baseline, mid-treatment, post-treatment, and 3-month follow-up [primary  
27 endpoint]), treatment group (guided ICBT, unguided ICBT, f2f CBT) and an interaction effect  
28 of treatment group x time to allow for the differential change between the three groups from  
29 baseline to the 3-month follow-up. The models will include individuals’ random intercept and  
30 random slope to account for variability between and within participants over time. Within-  
31 and between-group effect sizes will be calculated with Cohen’s *d*.(44) Numbers needed to  
32 treat will be calculated based on responder status.  
33

34  
35 Alpha for all analyses will be set at 0.05. Non-inferiority is established when the 90% Wald  
36 confidence interval for the difference between treatment conditions excludes the pre-specified  
37 margin of inferiority, which is set at 3 points on the Y-BOCS (45, 46). This means that if the  
38 upper limit of the 90% confidence interval is less than 3 points, we are 95% confident that  
39 ICBT will be non-inferior to f2f CBT. The non-inferiority hypothesis will be tested of both  
40 therapist-guided and self-guided ICBT against the f2f CBT. Additional analyses of the 12-  
41 month follow-up data will determine whether the treatment gains are maintained long-term  
42 and whether ICBT is non-inferior to f2f CBT at follow-up.  
43

### 44 45 **Cost-effectiveness analysis**

46 Health economic data will be collected using the TIC-P(47) and the Swedish National Patient  
47 Register, the Swedish Prescribed Drugs Register and the longitudinal integrated data-base for  
48 health insurance and work-related research (LISA). Costs will be analysed using a societal  
49 perspective i.e. including both sick-leave, hospitalizations, service use, medication, etc. and  
50 analysed in relation to outcome (i.e. OCD symptoms and quality-adjusted life years using the  
51 Y-BOCS and EQ-5D, respectively). National tariffs will be used to estimate costs from health  
52 care visits. Productivity losses will be estimated using gross earnings data from each  
53 patient.(48) Treatment costs, i.e. therapist support time per patient logged on the platform and  
54 time spent on f2f sessions, will be included in the cost estimation.  
55  
56  
57  
58  
59

1  
2  
3 Cost-effectiveness comparisons will be analysed using incremental cost-effectiveness ratios.  
4 The "net benefit approach" will also be used. This approach estimates the cost-effectiveness  
5 depending on different societal willingness-to-pay values for one unit of improvement.(48)  
6 Non-parametric bootstrapping (one thousand replications) will be used to estimate the  
7 difference between ICBT (guided or unguided) and gold standard f2f CBT.  
8

### 9 **Analysis of predictors and moderators**

10 We will analyse predictors and moderators of response and remission status at 3- and 12-  
11 month follow-up using repeated k-fold cross validation with 10 folds and 20 repeats to reduce  
12 the risk of model instability (49, 50). We then average model performance over the repeats  
13 using area under the receiver operating characteristic curve (AUC) of sensitivity and  
14 specificity to distinguish between responders/remitters and non-responders/non-remitters (51).  
15

### 16 **Limitations**

17 There are several potential threats to the validity and generalizability of the current trial  
18 results, some of which apply to most clinical trials. First, the trial was designed to maximise  
19 the chances of the results being as generalizable as possible. However, despite the best of our  
20 efforts to recruit both clinic- and self-referred individuals, it will be difficult to confidently  
21 claim that our participants will be representative of the entire population of OCD patients in  
22 Sweden. For example, we will not know if our results are generalizable to patients with  
23 comorbid autism spectrum disorder or to patients who are too ill to seek help and participate  
24 in clinical studies. Second, it is impossible to conduct double-blinded clinical trials of  
25 behavioural interventions. In an effort to increase transparency, our design includes careful  
26 checks of the extent to which raters are blind to the group allocation. Third, while our study is  
27 well powered to test the non-inferiority hypothesis, it may not be powered to test the same  
28 hypothesis for all secondary measures or for the cost-effectiveness calculations. Fourth,  
29 patients in the unguided ICBT arm still have contact with health care professionals at  
30 baseline, during treatment and after treatment (e.g., bi-weekly telephone assessments, post-  
31 treatment and follow-up appointments). An entirely unguided treatment would involve limited  
32 or no contact with health care professionals.  
33  
34  
35

### 36 **Patient and public involvement**

37 We received input from patients from three previous OCD internet CBT trials which guided  
38 the design of the current study. In the current trial, no patients were involved in the design of  
39 the study or in the decision of outcome measures. Neither will patients be involved in the  
40 recruitment of participants or in the decision of the research question. A patient organization  
41 for OCD and related disorders (the Swedish OCD Foundation) will be involved in the  
42 recruitment of participants by informing their members about the study. We will assess the  
43 burden of the trial interventions on the patients by collecting information about adverse  
44 events, quality of life, and time spent on the treatment. We will gather information about the  
45 patients satisfaction with treatment through an online self-rating questionnaire at the end of  
46 treatment. We plan to disseminate the results of the research to study participants and to the  
47 Swedish OCD Foundation.  
48  
49  
50  
51  
52  
53  
54  
55  
56  
57  
58  
59

## ETHICS AND DISSEMINATION

The trial will be conducted in compliance with this study protocol, the Declaration of Helsinki and Good Clinical Practice (GCP). Karolinska Trial Alliance (KTA) is an external party that will monitor the study every 6 months and ensure that the study follows GCP, i.e. that all participants give informed written consent and that study related materials are handled correctly. All professionals involved in the study will attend a course in GCP and get certified by the KTA.

The study has been approved by the Regional Ethics Board of Stockholm (REPN 2015/1099-31/2) and registered at Clinicaltrials.gov (NCT02541968), and will be reported in accordance with the CONSORT statement for non-pharmacological trials.<sup>(52)</sup> Ethical risks are deemed minimal and both f2f CBT and ICBT have well-documented efficacy.

### Current trial status

Recruitment of participants started in September 2015 and the last participant is expected to reach the primary end-point (3-month follow-up) in February 2019. Primary data analysis will begin in April 2019. The naturalistic follow-up phase of the trial will continue until November 2019.

## CONCLUSION

OCD is associated with significant suffering, loss of function across multiple life domains, high suicide risk, and large societal costs. ICBT has great potential to increase access to evidence-based care for a large group of sufferers that normally do not receive evidence-based psychological treatments. The study outlined in this protocol is the first direct comparison of ICBT and gold standard f2f CBT and is a crucial step before ICBT can be recommended for use within the regular health-care system. The study will provide new insights into the effectiveness of different treatment modalities for OCD and the health economic evaluation will help decision-makers to rationally allocate available resources. Implementation of ICBT in regular healthcare would dramatically increase the availability of effective treatment to those suffering from OCD.

### Contributors

CR and LL wrote the first draft of the paper. All authors: CR, LL, OF, DMC, MB, EA and JE conceived the study and revised the manuscript for relevant scientific content. MB specifically revised the statistical analyses and power calculation sections of the paper. All authors approved the final version of the manuscript.

### Competing interests

All authors declare: no support from any organization for the submitted work; no financial relationships with any organizations that might have an interest in the submitted work in the previous three years; no other relationships or activities that could appear to have influenced the submitted work.



## Funding

This study is funded by the Swedish Research Council (K2013-61P-22168) and the regional agreement on medical training and clinical research (ALF) between Stockholm County Council and Karolinska Institutet.

## FIGURE CAPTIONS

Figure 1. CONSORT-flow diagram

## REFERENCES

1. Fullana MA, Vilagut G, Rojas-Farreras S, Mataix-Cols D, de Graaf R, Demyttenaere K, et al. Obsessive–compulsive symptom dimensions in the general population: Results from an epidemiological study in six European countries. *Journal of Affective Disorders*. 2010;124(3):291-9.
2. Fernández de la Cruz L, Rydell M, Runeson B, D'Onofrio BM, Brander G, Rück C, et al. Suicide in obsessive–compulsive disorder: a population-based study of 36 788 Swedish patients. *Molecular Psychiatry*. 2016;22:1626.
3. Huppert JD, Simpson HB, Nissenson KJ, Liebowitz MR, Foa EB. Quality of life and functional impairment in obsessive–compulsive disorder: a comparison of patients with and without comorbidity, patients in remission, and healthy controls. *Depression and Anxiety*. 2009;26(1):39-45.
4. Rasmussen SA, Eisen JL. Epidemiology of obsessive compulsive disorder. *J Clin Psychiatry*. 1990;51 Suppl:10-3; discussion 4.
5. Obsessive N. Compulsive Disorder: core interventions in the treatment of obsessive–compulsive disorder and body dysmorphic disorder. London: NICE. 2005.
6. Larsson BPM, Kaldo V, Broberg AG. Similarities and differences between practitioners of psychotherapy in Sweden: A comparison of attitudes between psychodynamic, cognitive, cognitive–behavioral, and integrative therapists. *Journal of Psychotherapy Integration*. 2009;19(1):34-66.
7. Shapiro DA, Cavanagh K, Lomas H. GEOGRAPHIC INEQUITY IN THE AVAILABILITY OF COGNITIVE BEHAVIOURAL THERAPY IN ENGLAND AND WALES. *Behavioural and Cognitive Psychotherapy*. 2003;31(2):185-92.
8. Goodwin R, Koenen KC, Hellman F, Guardino M, Struening E. Helpseeking and access to mental health treatment for obsessive-compulsive disorder. *Acta Psychiatr Scand*. 2002;106(2):143-9.
9. Andersson G, Cuijpers P, Carlbring P, Riper H, Hedman E. Guided Internet-based vs. face-to-face cognitive behavior therapy for psychiatric and somatic disorders: a systematic review and meta-analysis. *World Psychiatry*. 2014;13(3):288-95.
10. El Alaoui S, Hedman E, Kaldo V, Hesser H, Kraepelien M, Andersson E, et al. Effectiveness of Internet-based cognitive–behavior therapy for social anxiety disorder in clinical psychiatry. *Journal of consulting and clinical psychology*. 2015;83(5):902.

11. Hedman E, Ljótsson B, Kaldø V, Hesser H, El Alaoui S, Kraepelien M, et al. Effectiveness of Internet-based cognitive behaviour therapy for depression in routine psychiatric care. *Journal of Affective Disorders*. 2014;155:49-58.
12. Hedman E, Ljótsson B, Rück C, Bergström J, Andersson G, Kaldø V, et al. Effectiveness of Internet-based cognitive behaviour therapy for panic disorder in routine psychiatric care. *Acta Psychiatrica Scandinavica*. 2013;128(6):457-67.
13. Andersson E, Enander J, Andren P, Hedman E, Ljotsson B, Hursti T, et al. Internet-based cognitive behaviour therapy for obsessive-compulsive disorder: a randomized controlled trial. *Psychol Med*. 2012;42(10):2193-203.
14. Andersson E, Hedman E, Enander J, Radu Djurfeldt D, Ljotsson B, Cervenka S, et al. D-Cycloserine vs Placebo as Adjunct to Cognitive Behavioral Therapy for Obsessive-Compulsive Disorder and Interaction With Antidepressants: A Randomized Clinical Trial. *JAMA Psychiatry*. 2015;72(7):659-67.
15. Andersson E, Ljotsson B, Hedman E, Kaldø V, Paxling B, Andersson G, et al. Internet-based cognitive behavior therapy for obsessive compulsive disorder: a pilot study. *BMC Psychiatry*. 2011;11:125.
16. Andersson E, Steneby S, Karlsson K, Ljotsson B, Hedman E, Enander J, et al. Long-term efficacy of Internet-based cognitive behavior therapy for obsessive-compulsive disorder with or without booster: a randomized controlled trial. *Psychol Med*. 2014;44(13):2877-87.
17. Wootton BM, Dear BF, Johnston L, Terides MD, Titov N. Remote treatment of obsessive-compulsive disorder: A randomized controlled trial. *Journal of Obsessive-Compulsive and Related Disorders*. 2013;2(4):375-84.
18. Mahoney AE, Mackenzie A, Williams AD, Smith J, Andrews G. Internet cognitive behavioural treatment for obsessive compulsive disorder: A randomised controlled trial. *Behav Res Ther*. 2014;63C:99-106.
19. Herbst N, Voderholzer U, Thiel N, Schaub R, Knaevelsrud C, Stracke S, et al. No talking, just writing! Efficacy of an Internet-based cognitive behavioral therapy with exposure and response prevention in obsessive compulsive disorder. *Psychotherapy and psychosomatics*. 2014;83(3):165-75.
20. Lenhard F, Ssegonja R, Andersson E, Feldman I, Ruck C, Mataix-Cols D, et al. Cost-effectiveness of therapist-guided internet-delivered cognitive behaviour therapy for paediatric obsessive-compulsive disorder: results from a randomised controlled trial. *BMJ Open*. 2017;7(5):e015246.
21. Lenhard F, Andersson E, Mataix-Cols D, Rück C, Vigerland S, Högström J, et al. Therapist-Guided, Internet-Delivered Cognitive-Behavioral Therapy for Adolescents With Obsessive-Compulsive Disorder: A Randomized Controlled Trial. *Journal of the American Academy of Child & Adolescent Psychiatry*. 56(1):10-9.e2.
22. Hauschildt M, Schröder J, Moritz S. Randomized-controlled trial on a novel (meta-)cognitive self-help approach for obsessive-compulsive disorder ("myMCT"). *Journal of Obsessive-Compulsive and Related Disorders*. 2016;10:26-34.
23. Wootton BM, Dear BF, Johnston L, Terides MD, Titov N. Self-guided internet administered treatment for obsessive-compulsive disorder: Results from two open trials. *Journal of Obsessive-Compulsive and Related Disorders*. 2014;3(2):102-8.



- 1  
2  
3 24. Wootton BM, Dear BF, Johnston L, Terides MD, Titov N. Self-guided internet-delivered cognitive behavior therapy (iCBT) for obsessive-compulsive disorder: 12 month follow-up. *Internet Interventions*. 2015;2(3):243-7.
- 4  
5  
6 25. Kenwright M, Marks I, Graham C, Franes A, Mataix-Cols D. Brief scheduled phone support from a clinician to enhance computer-aided self-help for obsessive-compulsive disorder: randomized controlled trial. *J Clin Psychol*. 2005;61(12):1499-508.
- 7  
8  
9 26. Mataix-Cols D, Cameron R, Gega L, Kenwright M, Marks IM. Effect of referral source on outcome with cognitive-behavior therapy self-help. *Compr Psychiatry*. 2006;47(4):241-5.
- 10  
11  
12 27. Lecrubier Y, Sheehan DV, Weiller E, Amorim P, Bonora I, Harnett Sheehan K, et al. The Mini International Neuropsychiatric Interview (MINI). A short diagnostic structured interview: reliability and validity according to the CIDI. *European Psychiatry*. 1997;12(5):224-31.
- 13  
14  
15 28. First MB. Structured Clinical Interview for the DSM (SCID). *The Encyclopedia of Clinical Psychology*: John Wiley & Sons, Inc.; 2014.
- 16  
17  
18 29. Basoglu M, Marks I, Livanou M, Swinson R. Double-blindness procedures, rater blindness, and ratings of outcome. Observations from a controlled trial. *Arch Gen Psychiatry*. 1997;54(8):744-8.
- 19  
20  
21 30. Mataix-Cols D, Fernandez de la Cruz L, Nordstletten AE, Lenhard F, Isomura K, Simpson HB. Towards an international expert consensus for defining treatment response, remission, recovery and relapse in obsessive-compulsive disorder. *World psychiatry : official journal of the World Psychiatric Association (WPA)*. 2016;15(1):80-1.
- 22  
23  
24 31. Yadin E, Foa, E. Lichner, T. . *Exposure and Response (Ritual) Prevention for Obsessive-Compulsive Disorder: Therapist Guide*: Oxford University Press; 2012.
- 25  
26  
27 32. Goodman WK, Price LH, Rasmussen SA, Mazure C, Fleischmann RL, Hill CL, et al. The Yale-Brown Obsessive Compulsive Scale. I. Development, use, and reliability. *Arch Gen Psychiatry*. 1989;46(11):1006-11.
- 28  
29  
30 33. Guy W. Clinical global impression scale. *The ECDEU Assessment Manual for Psychopharmacology-Revised Volume DHEW Publ No ADM*. 1976;76(338):218-22.
- 31  
32  
33 34. Spitzer RL, Gibbon M, Williams J, Endicott J. Global assessment of functioning (GAF) scale. Outcome assessment in clinical practice. 1996:76-8.
- 34  
35  
36 35. Foa EB, Huppert JD, Leiberg S, Langner R, Kichic R, Hajcak G, et al. The Obsessive-Compulsive Inventory: Development and validation of a short version. *Psychological Assessment*. 2002;14(4):485-96.
- 37  
38  
39 36. Svanborg P, Asberg M. A comparison between the Beck Depression Inventory (BDI) and the self-rating version of the Montgomery Asberg Depression Rating Scale (MADRS). *J Affect Disord*. 2001;64(2-3):203-16.
- 40  
41  
42 37. Sheehan D. Sheehan disability scale. *Handbook of psychiatric measures*. 2000:113-5.
- 43  
44  
45 38. EuroQol G. EuroQol--a new facility for the measurement of health-related quality of life. *Health Policy*. 1990;16(3):199-208.
- 46  
47  
48 39. Simpson HB, Maher M, Page JR, Gibbons CJ, Franklin ME, Foa EB. Development of a Patient Adherence Scale for Exposure and Response Prevention Therapy. *Behavior therapy*. 2010;41(1):30-7.

- 1  
2  
3 40. Tracey TJK, A. M. . Factor structure of the Working Alliance Inventory.  
4 Psychological Assessment: A Journal of Consulting and Clinical Psychology. 1989;1:207–10.
- 5  
6 41. Bastien CH, Vallières A, Morin CM. Validation of the Insomnia Severity Index  
7 as an outcome measure for insomnia research. *Sleep Medicine*.2(4):297-307.
- 8  
9 42. Devilly GJ, Borkovec TD. Psychometric properties of the credibility/expectancy  
10 questionnaire. *Journal of Behavior Therapy and Experimental Psychiatry*. 2000;31(2):73-86.
- 11  
12 43. Greenhill LL, Vitiello B, Fisher P, Levine J, Davies M, Abikoff H, et al.  
13 Comparison of Increasingly Detailed Elicitation Methods for the Assessment of Adverse  
14 Events in Pediatric Psychopharmacology. *Journal of the American Academy of Child &  
15 Adolescent Psychiatry*. 2004;43(12):1488-96.
- 16  
17 44. Cohen J. *Statistical power analysis for the behavioural sciences*. Hillside. NJ:  
18 Lawrence Earlbaum Associates. 1988.
- 19  
20 45. Lovell K, Cox D, Haddock G, Jones C, Raines D, Garvey R, et al. Telephone  
21 administered cognitive behaviour therapy for treatment of obsessive compulsive disorder:  
22 randomised controlled non-inferiority trial. *BMJ*. 2006;333(7574):883.
- 23  
24 46. Turner CM, Mataix-Cols D, Lovell K, Krebs G, Lang K, Byford S, et al.  
25 Telephone cognitive-behavioral therapy for adolescents with obsessive-compulsive disorder:  
26 a randomized controlled non-inferiority trial. *J Am Acad Child Adolesc Psychiatry*.  
27 2014;53(12):1298-307 e2.
- 28  
29 47. Hakkaart-van Roijen L, Van Straten A, Donker M, Tiemens B. *Trimbos/iMTA  
30 questionnaire for costs associated with psychiatric illness (TIC-P)*. Rotterdam: Institute for  
31 Medical Technology Assessment. 2002.
- 32  
33 48. Drummond MF, Sculpher MJ, Claxton K, Stoddart GL, Torrance GW. *Methods  
34 for the economic evaluation of health care programmes*: Oxford university press; 2015.
- 35  
36 49. Molinaro AM, Simon R, Pfeiffer RM. Prediction error estimation: a comparison  
37 of resampling methods. *Bioinformatics*. 2005;21(15):3301-7.
- 38  
39 50. Kim J-H. Estimating classification error rate: Repeated cross-validation,  
40 repeated hold-out and bootstrap. *Computational Statistics & Data Analysis*.  
41 2009;53(11):3735-45.
- 42  
43 51. Bradley AP. The use of the area under the ROC curve in the evaluation of  
44 machine learning algorithms. *Pattern Recognition*. 1997;30(7):1145-59.
- 45  
46  
47  
48  
49  
50  
51  
52  
53  
54  
55  
56  
57  
58  
59  
60 52. Schulz KF, Altman DG, Moher D. CONSORT 2010 Statement: updated  
guidelines for reporting parallel group randomised trials. *BMC Medicine*. 2010;8(1):18.

1  
2  
3  
4  
5  
6  
7  
8  
9  
10  
11  
12  
13  
14  
15  
16  
17  
18  
19  
20  
21  
22  
23  
24  
25  
26  
27  
28  
29  
30  
31  
32  
33  
34  
35  
36  
37  
38  
39  
40  
41  
42  
43  
44  
45  
46  
47  
48  
49  
50  
51  
52  
53  
54  
55  
56  
57  
58  
59  
60

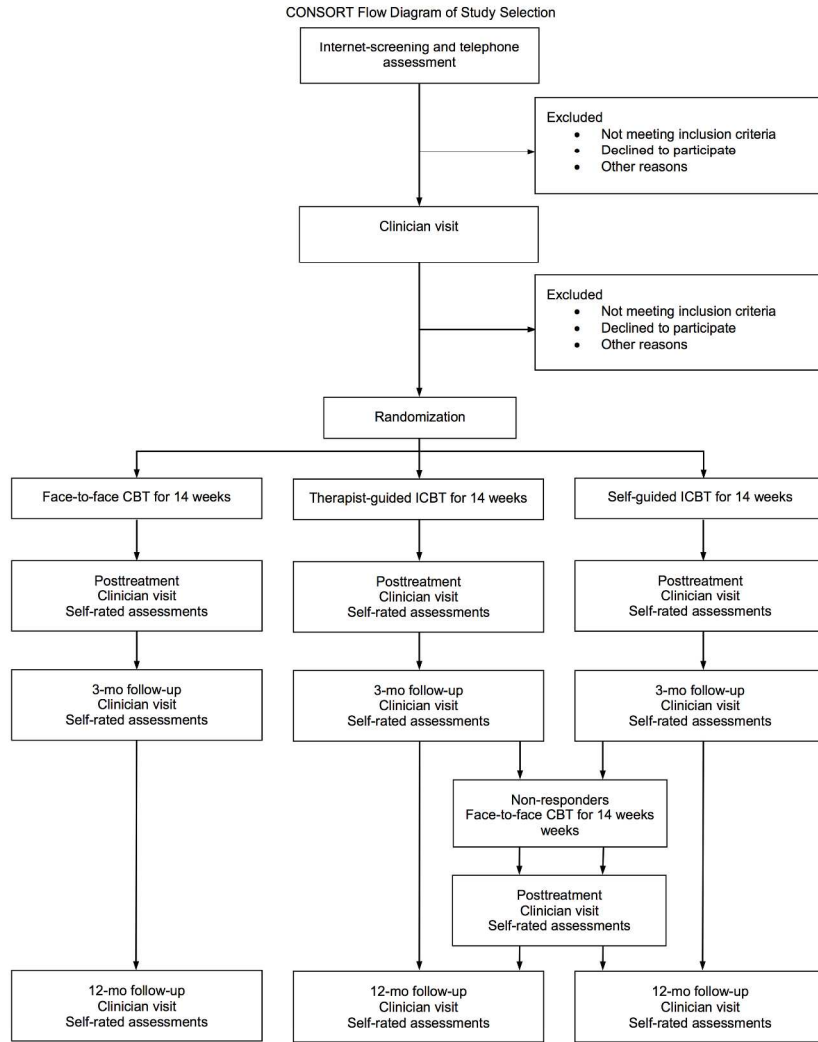

215x279mm (300 x 300 DPI)

## Interim power-analysis by Karolinska Trial Alliance

Supplement material to “Study protocol for a single-blind, randomized controlled, non- inferiority trial of Internet-based versus face-to-face cognitive behaviour therapy for obsessive-compulsive disorder”

Christian Rück, Lina Lundström, Oskar Flygare, Jesper Enander, Matteo Bottai, David Mataix-Cols, Erik Andersson

To make sure that the study would be informative, without looking at the outcome data ourselves, we requested an interim power-analysis by the *Karolinska Trial Alliance* (KTA). KTA is an independent body that monitors clinical trials and makes sure that researchers follow good clinical practice.

Because our power calculation used variances of regressions coefficients rather than estimates of the coefficients themselves [1], we were able to request estimates on our collected data (80 out of 120 individuals) without including the grouping variable in the data and inadvertently revealing the results. The interim power-analysis would inform us whether the initial power calculation, using data from [2], was accurate or not.

We extracted data needed for the analysis (ID-number and Y-BOCS ratings for all time-points except the 12-month follow-up) and sent to KTA with instructions for how to fit the correct mixed-effects model and obtain variance estimates. We received their report with the following variance estimates:

- Random intercept variance of 12.77
- Random slope variance of 10.02
- Residual variance of 14.10

We then used these estimates in an updated power calculation and concluded that our planned sample size of 120 participants would be sufficient for the study to be informative with a non-inferiority margin of 3 points on the clinician-rated Y-BOCS [3].

### Supplement references

1 Yi Q, Panzarella T. Estimating sample size for tests on trends across repeated measurements with missing data based on the interaction term in a mixed model. *Control Clin Trials* 2002;**23**:481–496. doi: doi.org/10.1016/S0197-2456(02)00223-4

2 Andersson E, Hedman E, Enander J *et al.* D-Cycloserine vs Placebo as Adjunct to Cognitive Behavioral Therapy for Obsessive-Compulsive Disorder and Interaction With Antidepressants. *JAMA Psychiatry* 2015;**72**:659.

1  
2  
3  
4  
5  
6  
7  
8  
9  
10  
11  
12  
13  
14  
15  
16  
17  
18  
19  
20  
21  
22  
23  
24  
25  
26  
27  
28  
29  
30  
31  
32  
33  
34  
35  
36  
37  
38  
39  
40  
41  
42  
43  
44  
45  
46  
47  
48  
49  
50  
51  
52  
53  
54  
55  
56  
57  
58  
59  
60

3 Goodman WK, Price LH, Rasmussen SA *et al.* The Yale-Brown Obsessive Compulsive Scale. I. Development, Use, and Reliability. *Arch Gen Psychiatry* 1989;**46**:1012–6.  
doi:[10.1001/archpsyc.1989.01810110048007](https://doi.org/10.1001/archpsyc.1989.01810110048007)

For peer review only

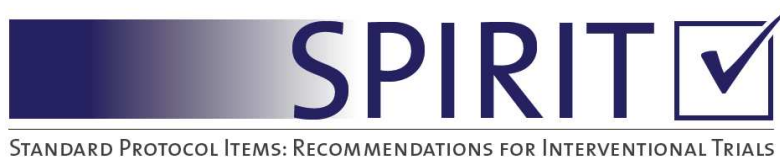

SPIRIT 2013 Checklist: Recommended items to address in a clinical trial protocol and related documents\*

| Section/item                      | Item No | Description                                                                                                                                                                                                                                                                                                 |
|-----------------------------------|---------|-------------------------------------------------------------------------------------------------------------------------------------------------------------------------------------------------------------------------------------------------------------------------------------------------------------|
| <b>Administrative information</b> |         |                                                                                                                                                                                                                                                                                                             |
| Title                             | 1       | Descriptive title identifying the study design, population, interventions, and, if applicable, trial acronym ( <b>page 1</b> )                                                                                                                                                                              |
| Trial registration                | 2a      | Trial identifier and registry name. If not yet registered, name of intended registry ( <b>page 9</b> )                                                                                                                                                                                                      |
|                                   | 2b      | All items from the World Health Organization Trial Registration Data Set                                                                                                                                                                                                                                    |
| Protocol version                  | 3       | Date and version identifier                                                                                                                                                                                                                                                                                 |
| Funding                           | 4       | Sources and types of financial, material, and other support ( <b>page 10</b> )                                                                                                                                                                                                                              |
| Roles and responsibilities        | 5a      | Names, affiliations, and roles of protocol contributors ( <b>page 1,10</b> )                                                                                                                                                                                                                                |
|                                   | 5b      | Name and contact information for the trial sponsor ( <b>page 1</b> )                                                                                                                                                                                                                                        |
|                                   | 5c      | Role of study sponsor and funders, if any, in study design; collection, management, analysis, and interpretation of data; writing of the report; and the decision to submit the report for publication, including whether they will have ultimate authority over any of these activities ( <b>page 10</b> ) |
|                                   | 5d      | Composition, roles, and responsibilities of the coordinating centre, steering committee, endpoint adjudication committee, data management team, and other individuals or groups overseeing the trial, if applicable (see Item 21a for data monitoring committee) ( <b>page 10</b> )                         |
| <b>Introduction</b>               |         |                                                                                                                                                                                                                                                                                                             |
| Background and rationale          | 6a      | Description of research question and justification for undertaking the trial, including summary of relevant studies (published and unpublished) examining benefits and harms for each intervention ( <b>page 3</b> )                                                                                        |
|                                   | 6b      | Explanation for choice of comparators ( <b>page 4</b> )                                                                                                                                                                                                                                                     |
| Objectives                        | 7       | Specific objectives or hypotheses ( <b>page 4</b> )                                                                                                                                                                                                                                                         |

1 Trial design 8 Description of trial design including type of trial (eg, parallel group,  
2 crossover, factorial, single group), allocation ratio, and framework (eg,  
3 superiority, equivalence, noninferiority, exploratory) (**page 4**)  
4  
5  
6

7 **Methods: Participants, interventions, and outcomes**  
8

9 Study setting 9 Description of study settings (eg, community clinic, academic hospital)  
10 and list of countries where data will be collected. Reference to where  
11 list of study sites can be obtained (**page 5**)  
12

13 Eligibility criteria 10 Inclusion and exclusion criteria for participants. If applicable, eligibility  
14 criteria for study centres and individuals who will perform the  
15 interventions (eg, surgeons, psychotherapists) (**page 5**)  
16

17 Interventions 11a Interventions for each group with sufficient detail to allow replication,  
18 including how and when they will be administered (**page 6**)  
19

20 11b Criteria for discontinuing or modifying allocated interventions for a  
21 given trial participant (eg, drug dose change in response to harms,  
22 participant request, or improving/worsening disease) (**page 6**)  
23

24 11c Strategies to improve adherence to intervention protocols, and any  
25 procedures for monitoring adherence (eg, drug tablet return,  
26 laboratory tests) (**page 6**)  
27

28 11d Relevant concomitant care and interventions that are permitted or  
29 prohibited during the trial (**page 8**)  
30

31 Outcomes 12 Primary, secondary, and other outcomes, including the specific  
32 measurement variable (eg, systolic blood pressure), analysis metric  
33 (eg, change from baseline, final value, time to event), method of  
34 aggregation (eg, median, proportion), and time point for each  
35 outcome. Explanation of the clinical relevance of chosen efficacy and  
36 harm outcomes is strongly recommended (**page 6, 7**)  
37  
38

39 Participant 13 Time schedule of enrolment, interventions (including any run-ins and  
40 timeline washouts), assessments, and visits for participants. A schematic  
41 diagram is highly recommended (see Figure) (**page 4**)  
42  
43

44 Sample size 14 Estimated number of participants needed to achieve study objectives  
45 and how it was determined, including clinical and statistical  
46 assumptions supporting any sample size calculations (**page 6**)  
47

48 Recruitment 15 Strategies for achieving adequate participant enrolment to reach  
49 target sample size (**page 5**)  
50

51 **Methods: Assignment of interventions (for controlled trials)**  
52

53 Allocation:  
54  
55  
56  
57  
58  
59  
60



|    |                |     |                                                                         |
|----|----------------|-----|-------------------------------------------------------------------------|
| 1  |                |     |                                                                         |
| 2  | Sequence       | 16a | Method of generating the allocation sequence (eg, computer-             |
| 3  | generation     |     | generated random numbers), and list of any factors for stratification.  |
| 4  |                |     | To reduce predictability of a random sequence, details of any planned   |
| 5  |                |     | restriction (eg, blocking) should be provided in a separate document    |
| 6  |                |     | that is unavailable to those who enrol participants or assign           |
| 7  |                |     | interventions ( <b>page 5</b> )                                         |
| 8  |                |     |                                                                         |
| 9  | Allocation     | 16b | Mechanism of implementing the allocation sequence (eg, central          |
| 10 | concealment    |     | telephone; sequentially numbered, opaque, sealed envelopes),            |
| 11 | mechanism      |     | describing any steps to conceal the sequence until interventions are    |
| 12 |                |     | assigned ( <b>page 5</b> )                                              |
| 13 |                |     |                                                                         |
| 14 | Implementation | 16c | Who will generate the allocation sequence, who will enrol participants, |
| 15 |                |     | and who will assign participants to interventions ( <b>page 5</b> )     |
| 16 |                |     |                                                                         |
| 17 | Blinding       | 17a | Who will be blinded after assignment to interventions (eg, trial        |
| 18 | (masking)      |     | participants, care providers, outcome assessors, data analysts), and    |
| 19 |                |     | how ( <b>page 5</b> )                                                   |
| 20 |                |     |                                                                         |
| 21 |                | 17b | If blinded, circumstances under which unblinding is permissible, and    |
| 22 |                |     | procedure for revealing a participant's allocated intervention during   |
| 23 |                |     | the trial ( <b>page 5</b> )                                             |
| 24 |                |     |                                                                         |
| 25 |                |     |                                                                         |

#### **Methods: Data collection, management, and analysis**

|    |                 |     |                                                                              |
|----|-----------------|-----|------------------------------------------------------------------------------|
| 26 |                 |     |                                                                              |
| 27 |                 |     |                                                                              |
| 28 | Data collection | 18a | Plans for assessment and collection of outcome, baseline, and other          |
| 29 | methods         |     | trial data, including any related processes to promote data quality (eg,     |
| 30 |                 |     | duplicate measurements, training of assessors) and a description of          |
| 31 |                 |     | study instruments (eg, questionnaires, laboratory tests) along with          |
| 32 |                 |     | their reliability and validity, if known. Reference to where data            |
| 33 |                 |     | collection forms can be found, if not in the protocol ( <b>page 6,7</b> )    |
| 34 |                 |     |                                                                              |
| 35 |                 | 18b | Plans to promote participant retention and complete follow-up,               |
| 36 |                 |     | including list of any outcome data to be collected for participants who      |
| 37 |                 |     | discontinue or deviate from intervention protocols                           |
| 38 |                 |     |                                                                              |
| 39 | Data            | 19  | Plans for data entry, coding, security, and storage, including any           |
| 40 | management      |     | related processes to promote data quality (eg, double data entry;            |
| 41 |                 |     | range checks for data values). Reference to where details of data            |
| 42 |                 |     | management procedures can be found, if not in the protocol ( <b>page 8</b> ) |
| 43 |                 |     |                                                                              |
| 44 |                 |     |                                                                              |
| 45 | Statistical     | 20a | Statistical methods for analysing primary and secondary outcomes.            |
| 46 | methods         |     | Reference to where other details of the statistical analysis plan can be     |
| 47 |                 |     | found, if not in the protocol ( <b>page 8</b> )                              |
| 48 |                 |     |                                                                              |
| 49 |                 | 20b | Methods for any additional analyses (eg, subgroup and adjusted               |
| 50 |                 |     | analyses) ( <b>page 8</b> )                                                  |
| 51 |                 |     |                                                                              |
| 52 |                 | 20c | Definition of analysis population relating to protocol non-adherence         |
| 53 |                 |     | (eg, as randomised analysis), and any statistical methods to handle          |
| 54 |                 |     | missing data (eg, multiple imputation) ( <b>page 8</b> )                     |
| 55 |                 |     |                                                                              |
| 56 |                 |     |                                                                              |
| 57 |                 |     |                                                                              |
| 58 |                 |     |                                                                              |
| 59 |                 |     |                                                                              |
| 60 |                 |     |                                                                              |

**Methods: Monitoring**

|                 |     |                                                                                                                                                                                                                                                                                                                                                         |
|-----------------|-----|---------------------------------------------------------------------------------------------------------------------------------------------------------------------------------------------------------------------------------------------------------------------------------------------------------------------------------------------------------|
| Data monitoring | 21a | Composition of data monitoring committee (DMC); summary of its role and reporting structure; statement of whether it is independent from the sponsor and competing interests; and reference to where further details about its charter can be found, if not in the protocol. Alternatively, an explanation of why a DMC is not needed ( <b>page 5</b> ) |
|                 | 21b | Description of any interim analyses and stopping guidelines, including who will have access to these interim results and make the final decision to terminate the trial                                                                                                                                                                                 |
| Harms           | 22  | Plans for collecting, assessing, reporting, and managing solicited and spontaneously reported adverse events and other unintended effects of trial interventions or trial conduct ( <b>page 8</b> )                                                                                                                                                     |
| Auditing        | 23  | Frequency and procedures for auditing trial conduct, if any, and whether the process will be independent from investigators and the sponsor                                                                                                                                                                                                             |

**Ethics and dissemination**

|                               |     |                                                                                                                                                                                                                                  |
|-------------------------------|-----|----------------------------------------------------------------------------------------------------------------------------------------------------------------------------------------------------------------------------------|
| Research ethics approval      | 24  | Plans for seeking research ethics committee/institutional review board (REC/IRB) approval ( <b>page 9</b> )                                                                                                                      |
| Protocol amendments           | 25  | Plans for communicating important protocol modifications (eg, changes to eligibility criteria, outcomes, analyses) to relevant parties (eg, investigators, REC/IRBs, trial participants, trial registries, journals, regulators) |
| Consent or assent             | 26a | Who will obtain informed consent or assent from potential trial participants or authorised surrogates, and how (see Item 32)                                                                                                     |
|                               | 26b | Additional consent provisions for collection and use of participant data and biological specimens in ancillary studies, if applicable                                                                                            |
| Confidentiality               | 27  | How personal information about potential and enrolled participants will be collected, shared, and maintained in order to protect confidentiality before, during, and after the trial                                             |
| Declaration of interests      | 28  | Financial and other competing interests for principal investigators for the overall trial and each study site ( <b>page 9</b> )                                                                                                  |
| Access to data                | 29  | Statement of who will have access to the final trial dataset, and disclosure of contractual agreements that limit such access for investigators                                                                                  |
| Ancillary and post-trial care | 30  | Provisions, if any, for ancillary and post-trial care, and for compensation to those who suffer harm from trial participation                                                                                                    |

|   |                         |     |                                                                                                                                                                                                                                                                                     |
|---|-------------------------|-----|-------------------------------------------------------------------------------------------------------------------------------------------------------------------------------------------------------------------------------------------------------------------------------------|
| 1 | Dissemination<br>policy | 31a | Plans for investigators and sponsor to communicate trial results to participants, healthcare professionals, the public, and other relevant groups (eg, via publication, reporting in results databases, or other data sharing arrangements), including any publication restrictions |
| 2 |                         | 31b | Authorship eligibility guidelines and any intended use of professional writers                                                                                                                                                                                                      |
| 3 |                         | 31c | Plans, if any, for granting public access to the full protocol, participant-level dataset, and statistical code                                                                                                                                                                     |

## Appendices

|   |                               |    |                                                                                                                                                                                                |
|---|-------------------------------|----|------------------------------------------------------------------------------------------------------------------------------------------------------------------------------------------------|
| 4 | Informed consent<br>materials | 32 | Model consent form and other related documentation given to participants and authorised surrogates                                                                                             |
| 5 |                               | 33 | Plans for collection, laboratory evaluation, and storage of biological specimens for genetic or molecular analysis in the current trial and for future use in ancillary studies, if applicable |

---

\*It is strongly recommended that this checklist be read in conjunction with the SPIRIT 2013 Explanation & Elaboration for important clarification on the items. Amendments to the protocol should be tracked and dated. The SPIRIT checklist is copyrighted by the SPIRIT Group under the Creative Commons "[Attribution-NonCommercial-NoDerivs 3.0 Unported](#)" license.
